# Supplementary material
Source: PubMed Central journal article supplement (PMC3330824)
Supplement: NIHMS354528-supplement-1_si_001.pdf [file NIHMS354528-supplement-1_si_001.pdf]

# Supporting Information

## Caspase-1 Inhibitors from an Extremophilic Fungus that Target Specific Leukemia Cell Lines

Andrea A. Stierle,\* Donald B. Stierle,\* and Teri Girtsman

*Department of Biomedical and Pharmaceutical Sciences, The University of Montana*

*Missoula, Montana 59812*

### Table of Contents

|     |                                                                                   |
|-----|-----------------------------------------------------------------------------------|
| S3  | <sup>1</sup> H NMR of Berkazaphilone A ( <b>1</b> ), 300 MHz, CDCl <sub>3</sub>   |
| S4  | <sup>13</sup> C NMR of Berkazaphilone A ( <b>1</b> ), 75 MHz, CDCl <sub>3</sub>   |
| S5  | COSY of Berkazaphilone A ( <b>1</b> ), 300 MHz, CDCl <sub>3</sub>                 |
| S6  | HMBC of Berkazaphilone A ( <b>1</b> ), 300 MHz, CDCl <sub>3</sub>                 |
| S7  | <sup>1</sup> H NMR of Berkazaphilone B ( <b>2</b> ), 300 MHz, CDCl <sub>3</sub>   |
| S8  | <sup>13</sup> C NMR of Berkazaphilone B ( <b>2</b> ), 75 MHz, CDCl <sub>3</sub>   |
| S9  | COSY of Berkazaphilone B ( <b>2</b> ), 300 MHz, CDCl <sub>3</sub>                 |
| S10 | HMBC of Berkazaphilone B ( <b>2</b> ), 300 MHz, CDCl <sub>3</sub>                 |
| S11 | <sup>1</sup> H NMR of Berkazaphilone C ( <b>4</b> ), 300 MHz, CDCl <sub>3</sub>   |
| S12 | <sup>13</sup> C NMR of Berkazaphilone C ( <b>4</b> ), 75 MHz, CDCl <sub>3</sub>   |
| S13 | Spectral data for compounds <b>6</b> , <b>7</b> , and <b>8</b>                    |
| S14 | Spectral Data for Compounds <b>9</b> , <b>10</b> , <b>11</b> , and <b>12</b>      |
| S16 | <sup>1</sup> H NMR of Berkedienoic acid ( <b>13</b> ), 300 MHz, CDCl <sub>3</sub> |
| S17 | <sup>13</sup> C NMR of Berkedienoic acid ( <b>13</b> ), 75 MHz, CDCl <sub>3</sub> |

- S18 COSY of Berkedienoic acid (**13**), 300 MHz, CDCl<sub>3</sub>
- S19 HMBC of Berkedienoic acid (**13**), 300 MHz, CDCl<sub>3</sub>
- S20 <sup>1</sup>H NMR of Berkedienolactone (**15**), 300 MHz, CDCl<sub>3</sub>
- S21 <sup>13</sup>C NMR of Berkedienolactone (**15**), 75 MHz, CDCl<sub>3</sub>
- S22 COSY of Berkedienolactone (**15**), 300 MHz, CDCl<sub>3</sub>
- S23 HMBC of Berkedienolactone (**15**), 300 MHz, CDCl<sub>3</sub>
- S24 NCI cell line data for berkazaphilone B (**2**)
- S25 NCI cell line data for berkazaphilone C (**4**)
- S26 NCI cell line data for penisimplicissin (**8**)

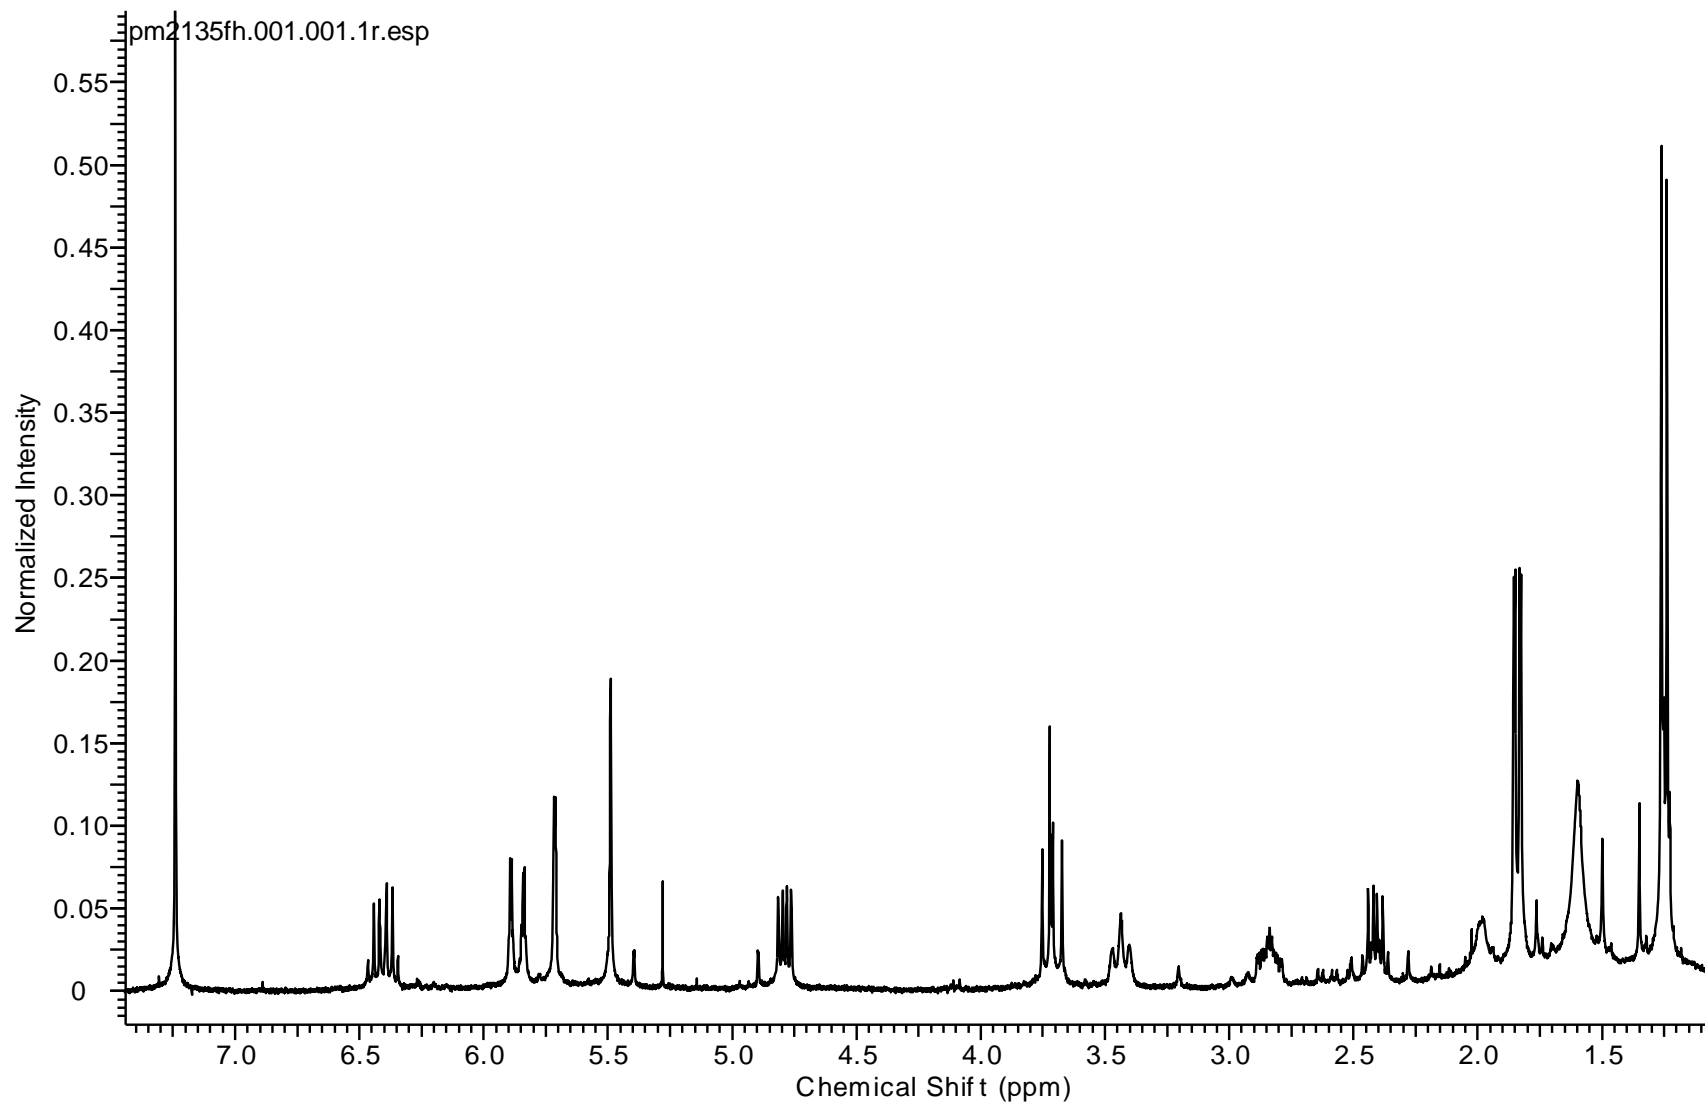

S3  $^1\text{H}$  NMR of Berkazaphilone A (**1**), 300 MHz,  $\text{CDCl}_3$

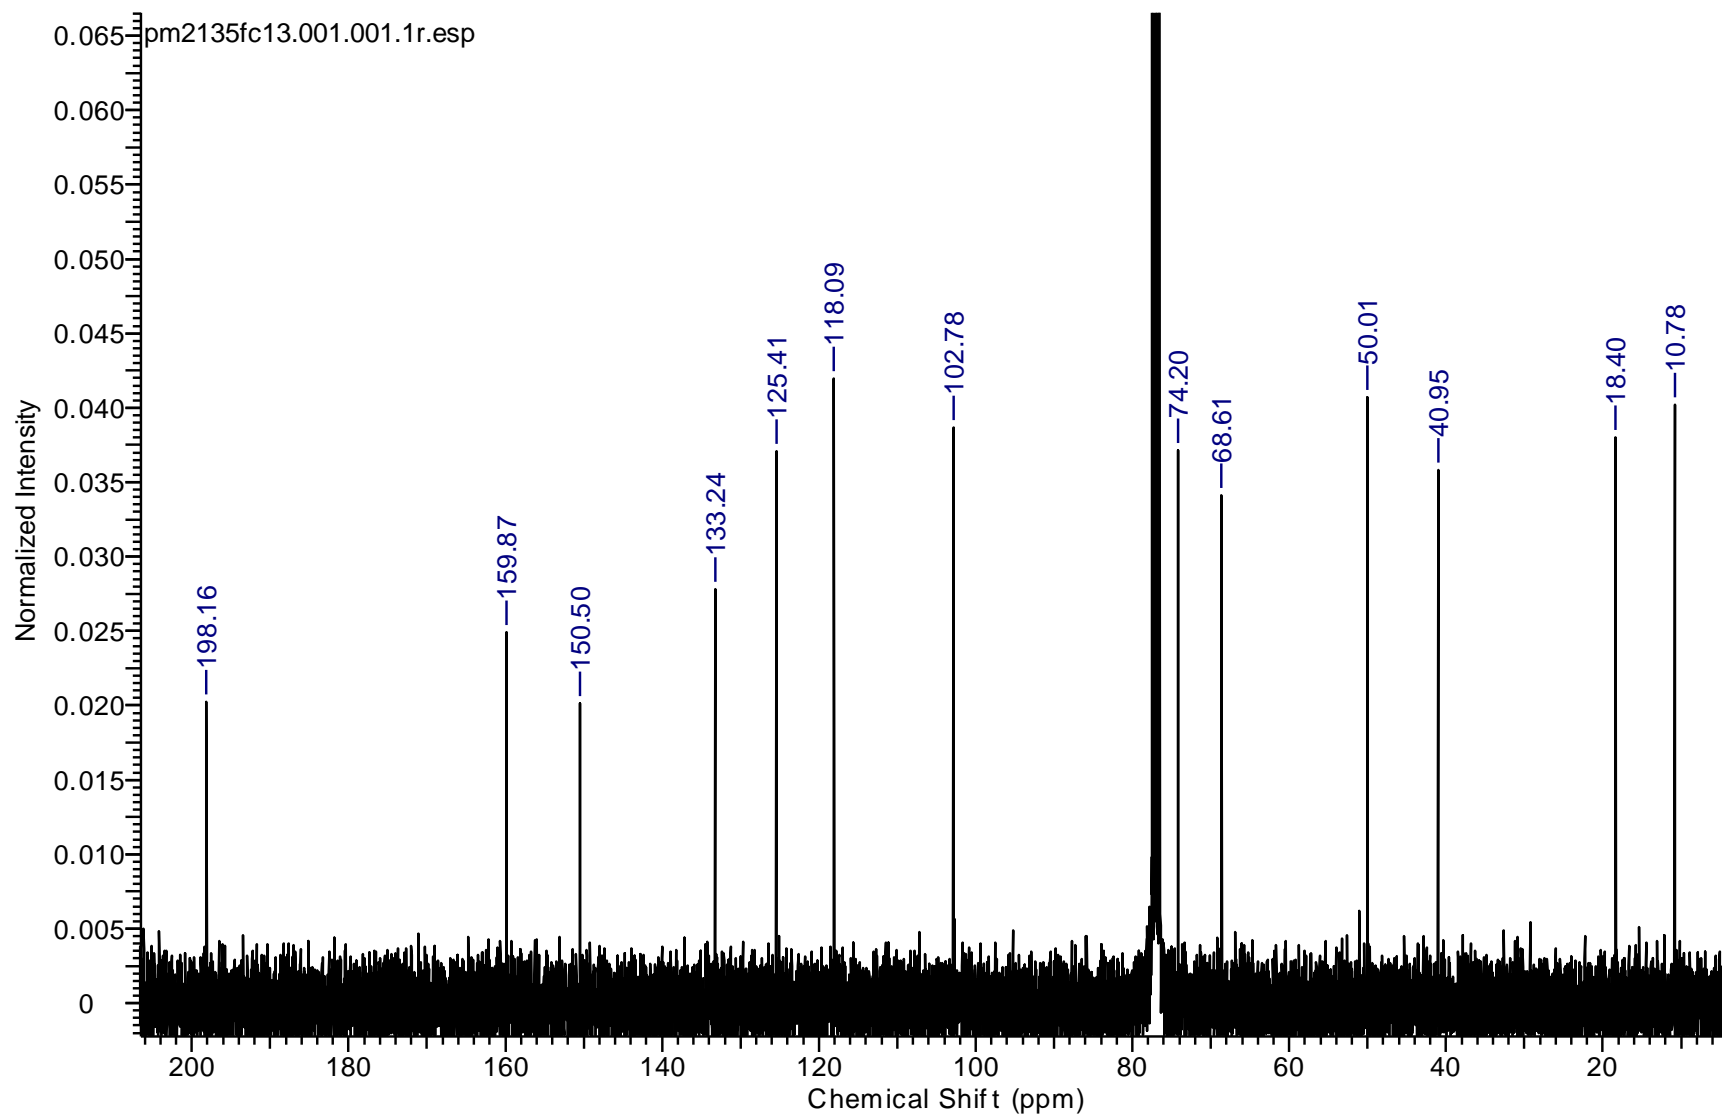

S4  $^{13}\text{C}$  NMR of Berkazaphilone A (1), 75 MHz,  $\text{CDCl}_3$

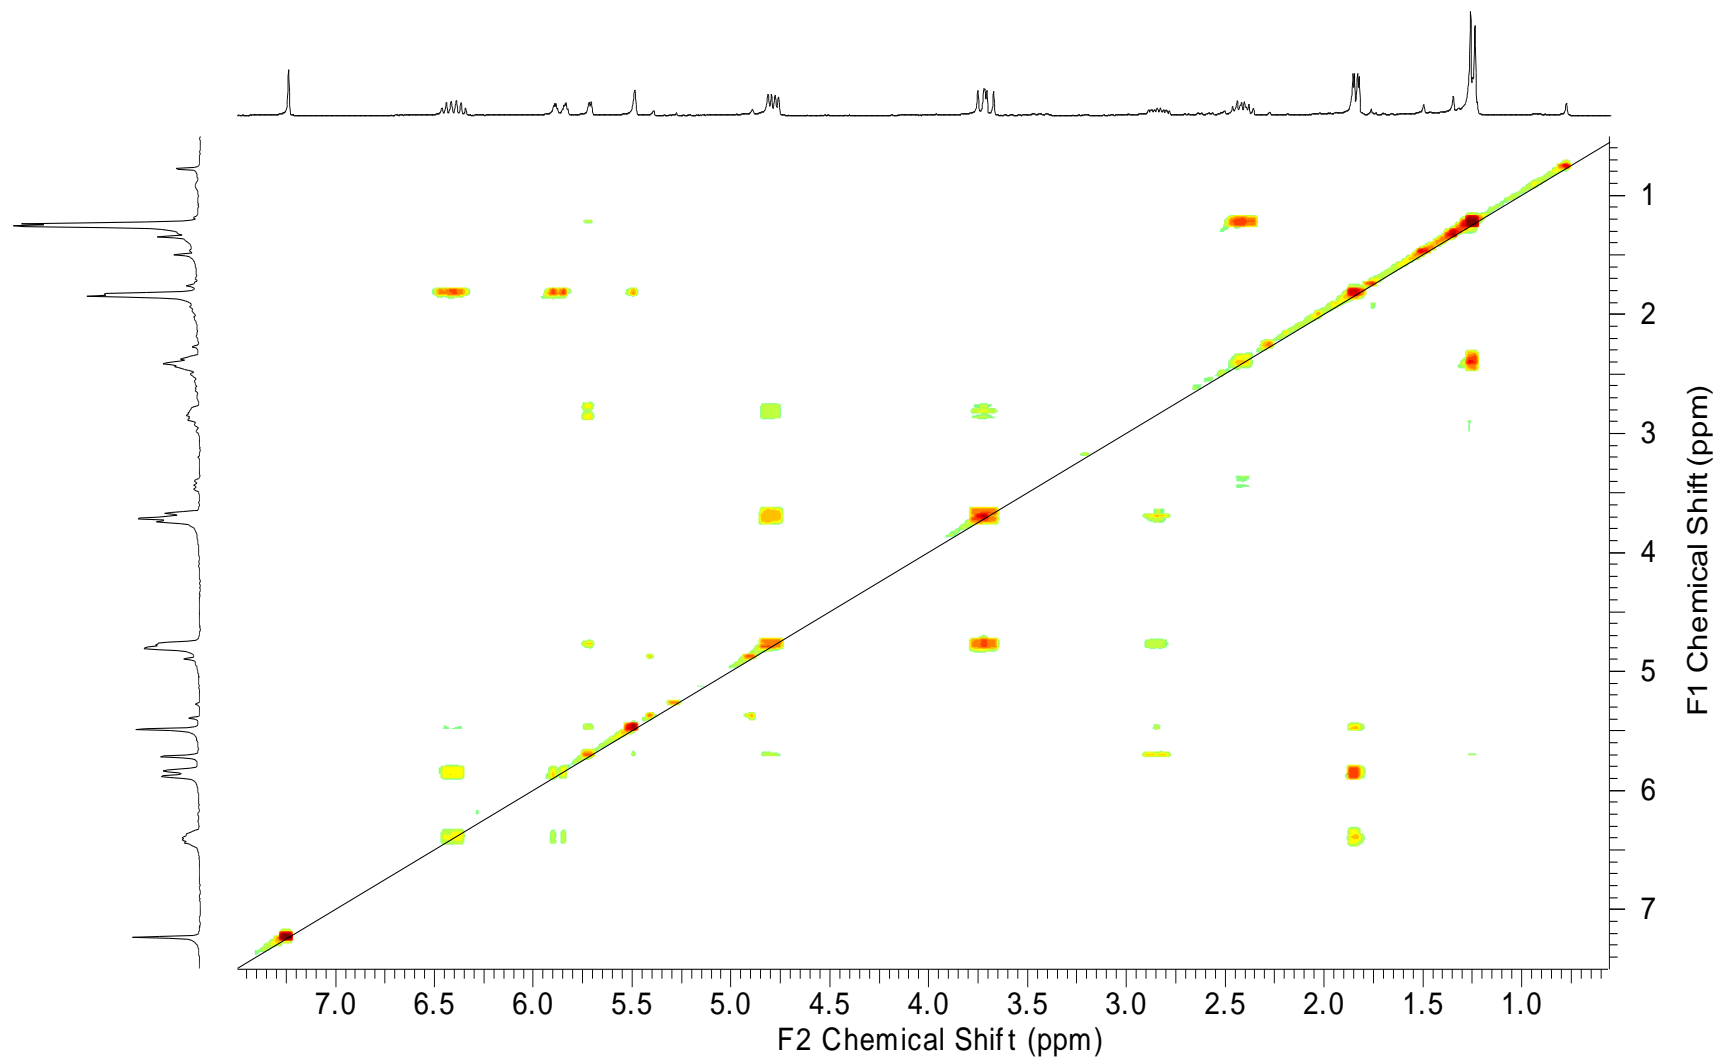

S5 COSY of Berkazaphilone A (1)

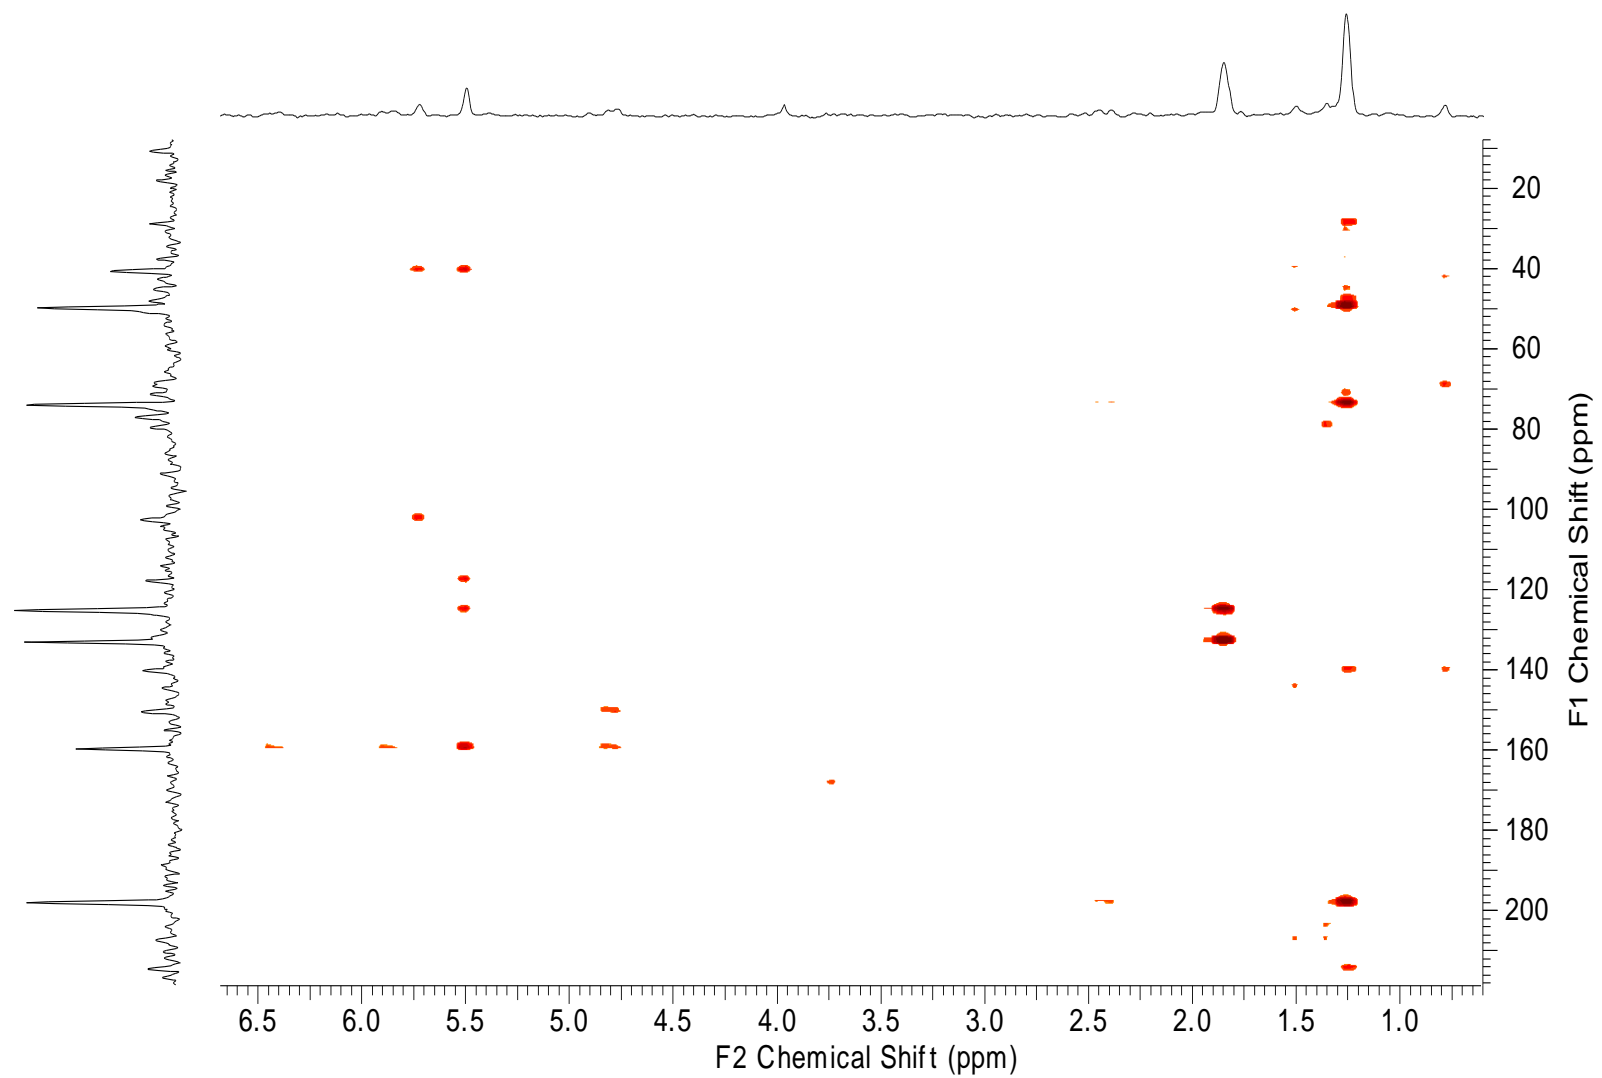

S6 HMBC of Berkazaphilone A (1)

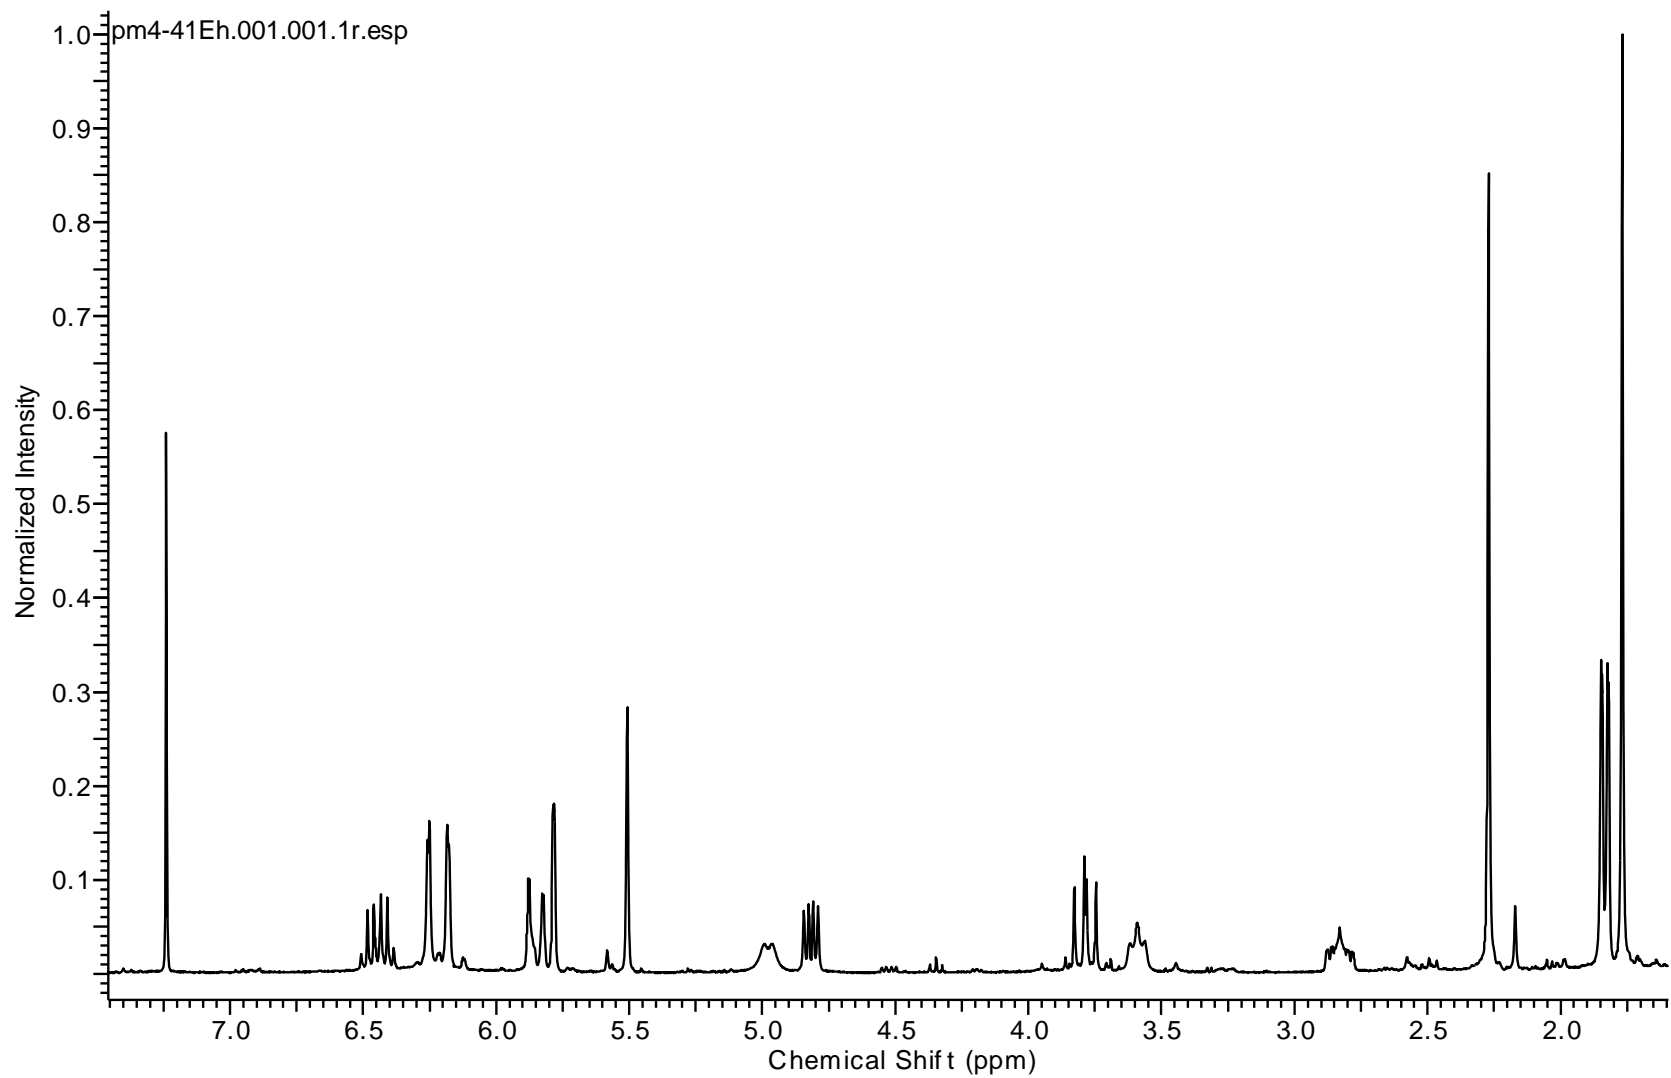

S7  $^1\text{H}$  NMR of Berkazaphilone B (**2**), 300 MHz,  $\text{CDCl}_3$

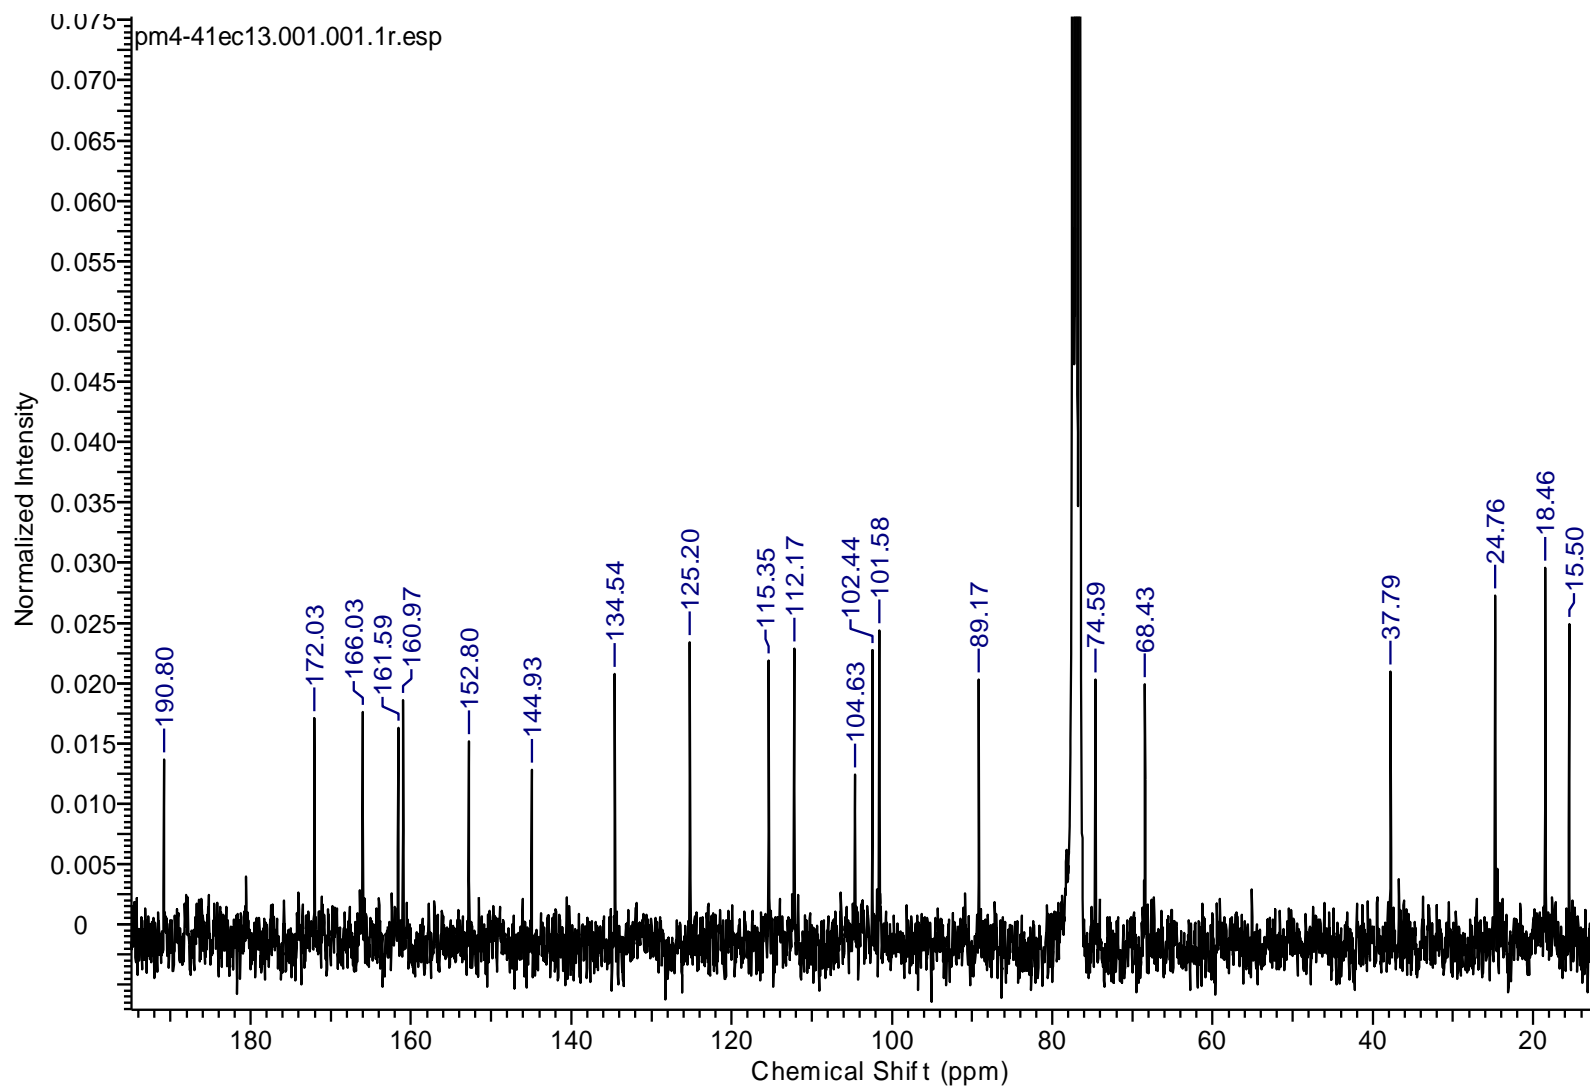

S8  $^{13}\text{C}$  NMR of Berkazaphilone B (**2**), 75 MHz,  $\text{CDCl}_3$



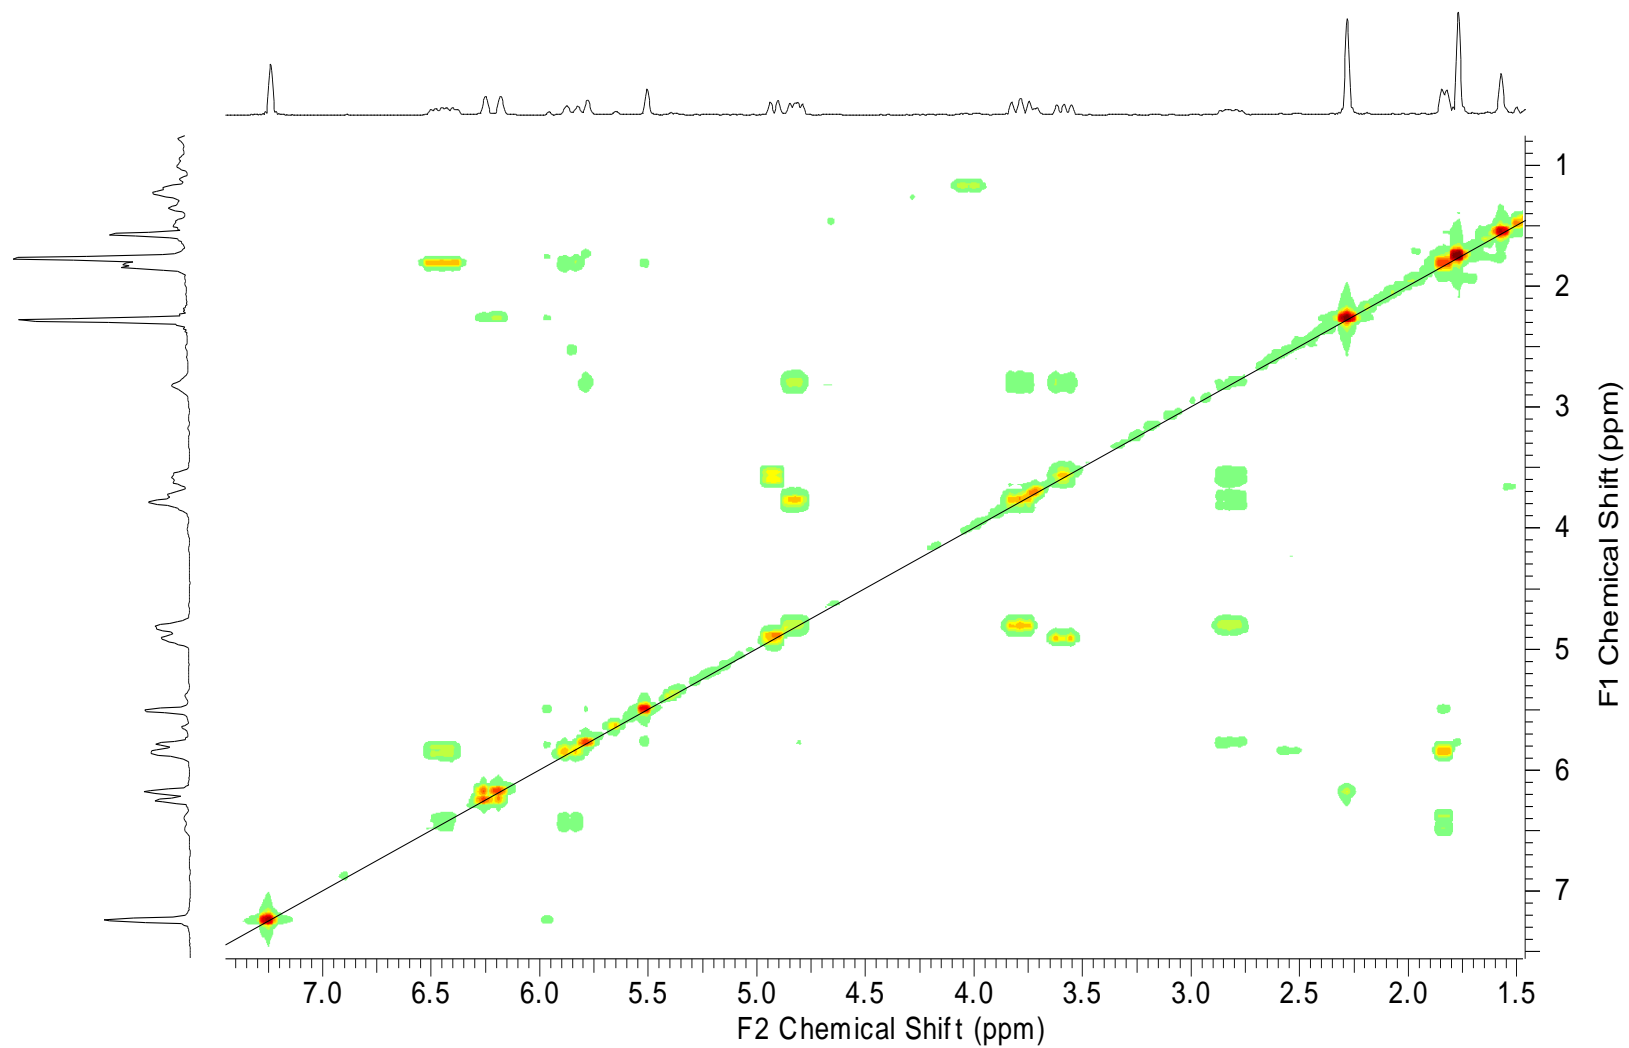

S9 COSY of Berkazaphilone B (2)

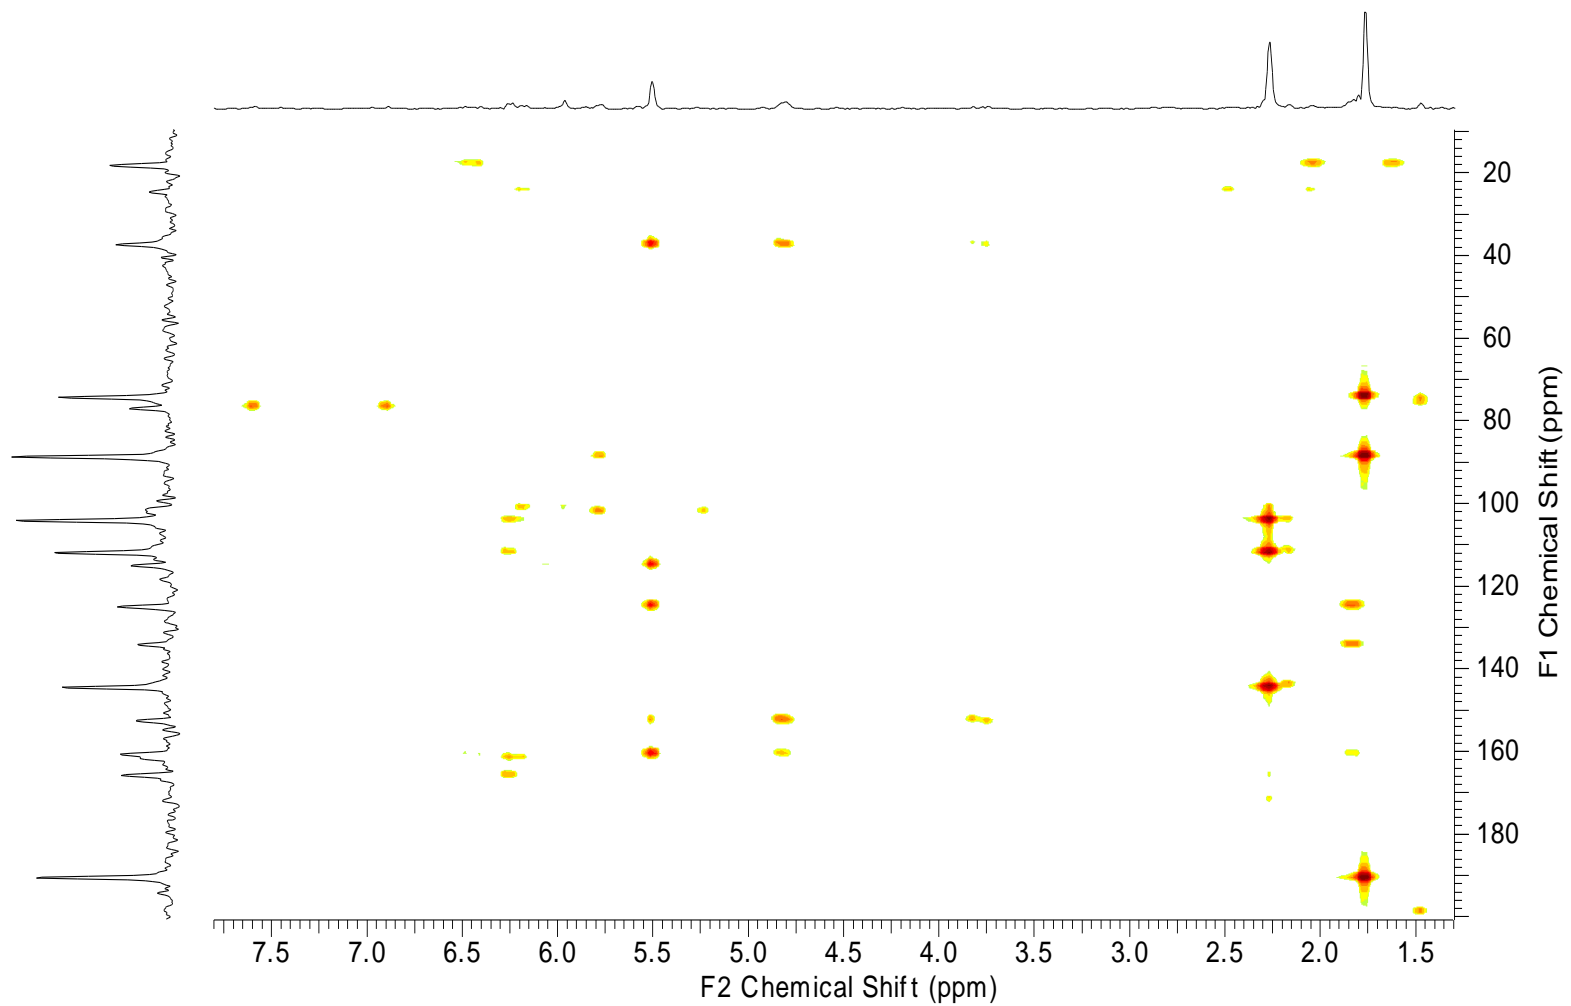

S10 HMBC of Berkazaphilone B (2)

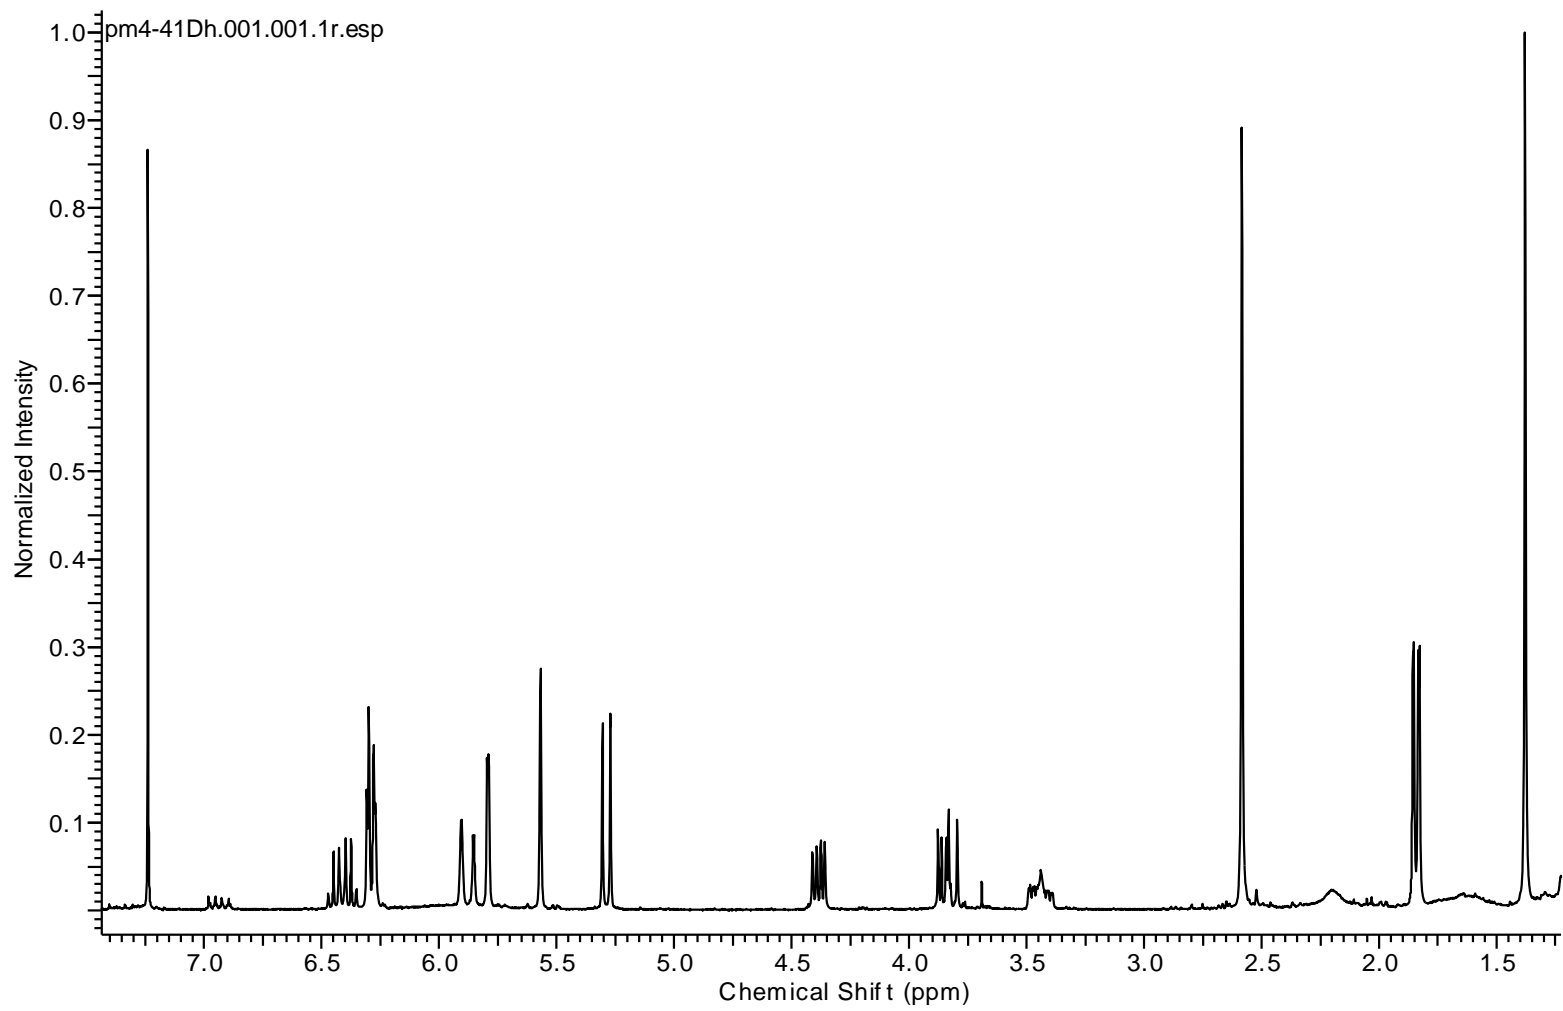

S11  $^1\text{H}$  NMR of Berkazaphilone C (**4**), 300 MHz,  $\text{CDCl}_3$

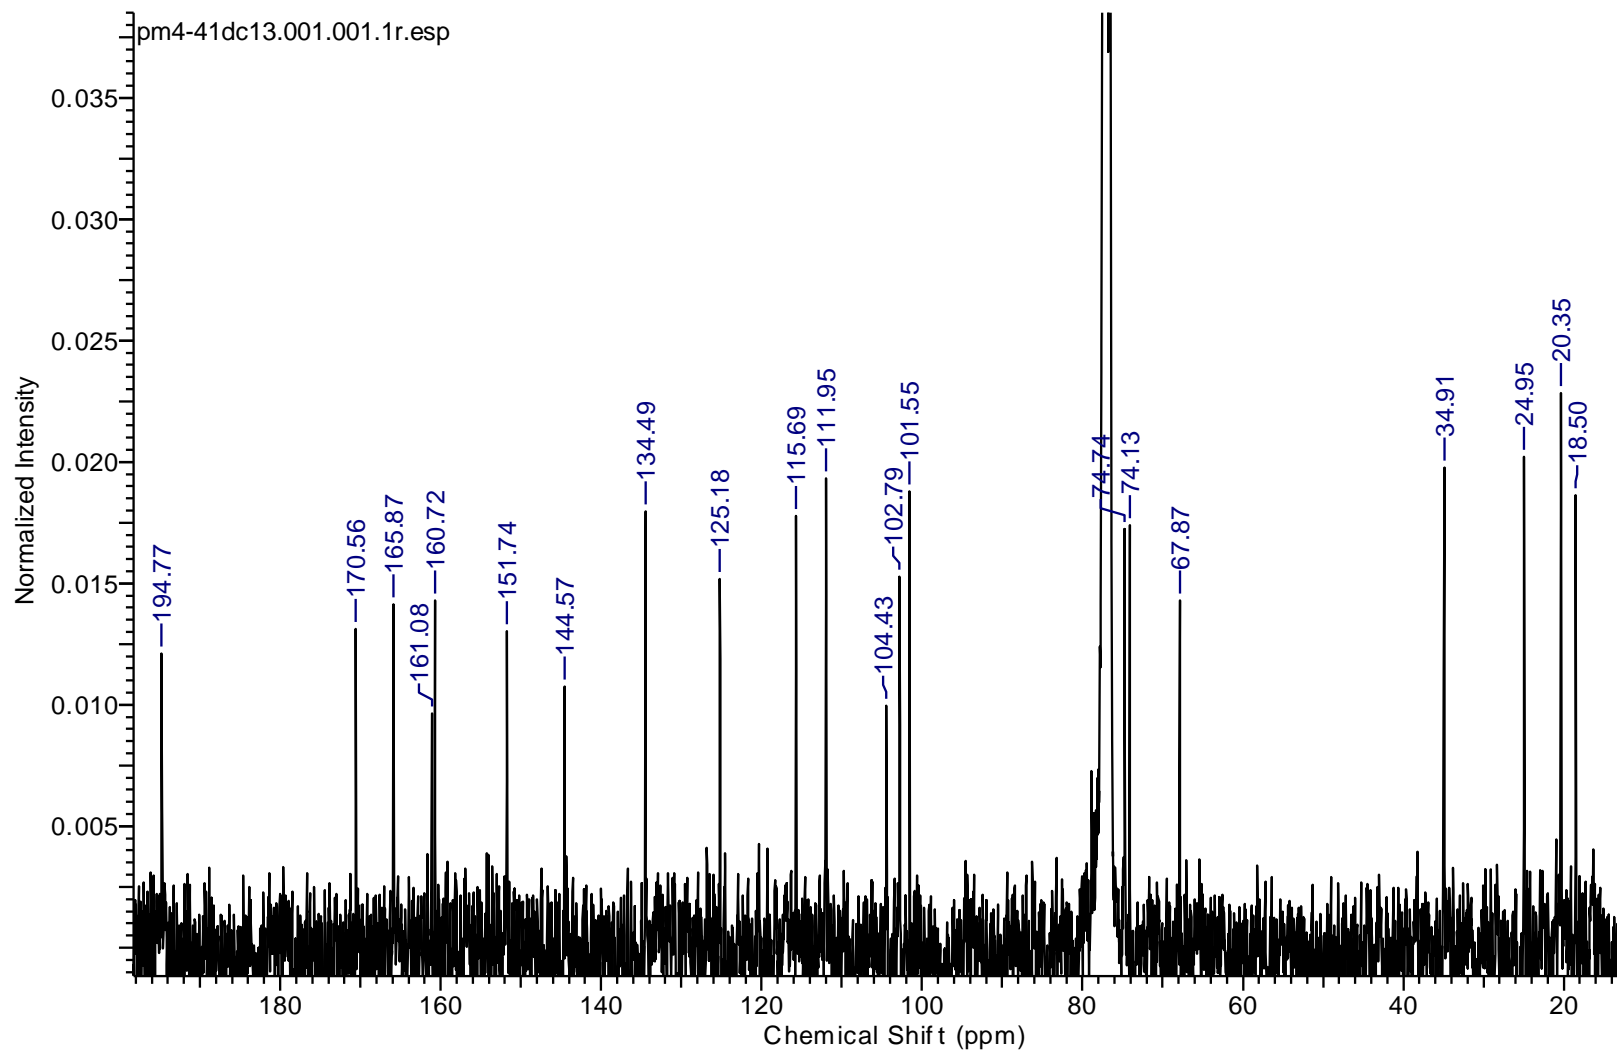

S12  $^{13}\text{C}$  NMR of Berkazaphilone C(4), 75 MHz,  $\text{CDCl}_3$

### Spectral Data for Compounds 6, 7 and 8

**Vermistatin (6):**  $[\alpha]_D^{25}$  -10.5° (c 0.0154, MeOH/CHCl<sub>3</sub>, 1:1).

**Dihydrovermistatin (7):** yellow solid,  $[\alpha]_D^{25}$  -28.6° (c 0.0091 CHCl<sub>3</sub>); UV (MeOH)  $\lambda_{\max}$  (log  $\epsilon$ ) 305 (3.35), 249 (3.57); IR (CHCl<sub>3</sub>)  $\nu_{\max}$  3013, 2966, 1770, 1668, 1506, 1238, 1120, 911 cm<sup>-1</sup>; <sup>1</sup>H NMR (CDCl<sub>3</sub>):  $\delta$  7.41 (s, 1H, H-2'), 6.96 (d,  $J$  = 2.0 Hz, H-7), 6.66 (d, 1H,  $J$  = 2.0 Hz, H-5), 6.44 (s, 1H, H-3), 6.17 (s, 1H, H-5'), 3.85 (s, 3H, C-6 OCH<sub>3</sub>), 3.77 (s, 3H, C-4 OCH<sub>3</sub>), 2.45 (t,  $J$  = 7.4 Hz, H-7'), 1.62 (m, 1H,  $J$  = 7.4 Hz, H-8'), 0.95 (t, 1H,  $J$  = 7.4 Hz, H-9'); <sup>13</sup>C NMR (CDCl<sub>3</sub>):  $\delta$  177.0 (C-4'), 170.0 (C-1), 169.4 (C-6'), 163.0 (C-6), 154.8 (C-4), 154.4 (C-2'), 129.3 (C-8), 127.7 (C-9), 123.3 (C-3'), 114.4 (C-5'), 105.1 (C-5), 98.9 (C-7), 73.5 (C-3), 56.0 (C-6 OCH<sub>3</sub>), 55.8 (C-4 OCH<sub>3</sub>), 35.2 (C-7'), 19.9 (C-8'), 13.4 (C-9'); EIMS  $m/z$  [M]<sup>+</sup> 330(100), 271(40), 217 (70); HREIMS  $m/z$  330.1108 [M]<sup>+</sup> (calcd for C<sub>18</sub>H<sub>18</sub>O<sub>6</sub>, 330.1103).

**Penisimplicissin (8):** yellow solid,  $[\alpha]_D^{25}$  -78.2° (c 0.0118, CHCl<sub>3</sub>); UV (MeOH)  $\lambda_{\max}$  (log  $\epsilon$ ) 448 (3.97), 310 (3.45); IR (CHCl<sub>3</sub>)  $\nu_{\max}$  3011, 1768, 1668, 1509, 1362, 1156, 910 cm<sup>-1</sup>; <sup>1</sup>H NMR (CDCl<sub>3</sub>)  $\delta$  7.41 (s, 1H, H-2'), 6.95 (d,  $J$  = 2.0 Hz, H-7), 6.65 (d,  $J$  = 2.0 Hz, H-5), 6.43 (s, 1H, H-3), 6.17 (s, 1H, H-5'), 3.85 (s, 3H, C-6 OCH<sub>3</sub>), 3.76 (s, 3H, C-4 OCH<sub>3</sub>), 2.44 (s, 3H, H-7'); <sup>13</sup>C NMR (CDCl<sub>3</sub>)  $\delta$  176.9 (C-4'), 170.4 (C-1), 166.0 (C-6'), 163.0 (C-6), 154.9 (C-4), 154.4 (C-2'), 129.3 (C-8), 127.7 (C-9), 123.3 (C-3'), 115.0 (C-5'), 105.1 (C-5), 98.9 (C-7), 73.5 (C-3), 56.0 (C-6 OCH<sub>3</sub>), 55.8 (C-4 OCH<sub>3</sub>), 19.6 (C-7'); EIMS  $m/z$  [M]<sup>+</sup> 302(100), 259 (30), 217 (30), 165 (32); HREIMS  $m/z$  302.0787 [M]<sup>+</sup> (calcd for C<sub>16</sub>H<sub>14</sub>O<sub>6</sub>, 302.0790).

### Spectral Data for Compounds 9, 10, 11, and 12

**Compound 9:** solid,  $[\alpha]_D^{25} +20.8^\circ$  (c 0.014, MeOH);  $^1\text{H NMR}$  ( $\text{CD}_3\text{OD}$ )  $\delta$  9.77 (1H, s, H-12), 6.22 (1H, s, H-5), 4.22 (1H, m, H-10), 4.04 (2H, s, H-7), 2.72 (1H, m, H-9), 2.61 (1H, m, H-9), 2.01 (3H, s, H-13), 1.19 (3H, d,  $J = 6.3$  Hz, H-11);  $^{13}\text{C NMR}$  ( $\text{CD}_3\text{OD}$ )  $\delta$  208.8 (C, C-8), 195.1 (CH, C-12), 165.2 (C, C-2), 164.6 (C, C-4), 139.1 (C, C-6), 113.8 (C, C-1), 111.9 (C, C-3), 111.5 (CH, C-5), 65.3 (CH, C-10), 52.1 ( $\text{CH}_2$ , C-9), 47.7 ( $\text{CH}_2$ , C-7), 23.8 ( $\text{CH}_3$ , C-11), 7.4 ( $\text{CH}_3$ , C-13); EIMS  $m/z$  252 (4), 234 (25), 166 (100); HREIMS  $m/z$  252.1003  $[\text{M}]^+$  (calcd for  $\text{C}_{13}\text{H}_{16}\text{O}_5$ , 252.0998).

**Chiral derivatization of compound 9.** Compound 9 (1.0 mg) was dissolved in dry pyridine (100  $\mu\text{L}$ ) and either the R or S stereoisomer of  $\alpha$ -methoxy- $\alpha$ -trifluoromethylphenylacetyl chloride (6  $\mu\text{L}$ ) added. The mixtures were stirred for 24 hours under nitrogen. After that time, MeOH (400  $\mu\text{L}$ ), was added and the solvents removed. The reaction mixtures were then each passed through a small Si gel column and eluted with  $\text{CH}_2\text{Cl}_2$  to give the R- and S- MTPA esters, 10. **(R)-MTPA ester-**  $^1\text{H NMR}$  ( $\text{CDCl}_3$ )  $\delta$  9.60 (1 H, s), 7.45 (5 H, m, aromatics), 6.85 (1 H, s), 5.55 (1 H, m), 3.60 (2H, s), 3.51 (3 H, s,  $\text{OCH}_3$ ), 3.03 (1 H, dd,  $J = 17.2, 7.9$  Hz), 2.85 (1 H, dd,  $J = 17.2, 5.0$  Hz), 1.81 (3 H, s), 1.32 (3 H, d,  $J = 6.4$  Hz).

**(S)-MTPA ester-**  $^1\text{H NMR}$  ( $\text{CDCl}_3$ )  $\delta$  9.57 (1 H, s), 7.41 (5 H, m, aromatics), 6.80 (1 H, s), 5.59 (1 H, m), 3.590 (2 H, s), 3.50 (3H, s,  $\text{OCH}_3$ ), 2.96 (1 H, dd,  $J = 17.2, 8.2$  Hz), 2.80 (1 H, dd,  $J = 17.2, 4.7$  Hz), 1.80 (3 H, s), 1.39 (1 H, d,  $J = 6.4$  Hz).

**Methyl paraconic acid (11):** solid,  $[\alpha]_D^{25} +29.1^\circ$  (c 0.0088,  $\text{CHCl}_3$ ); IR ( $\text{CHCl}_3$ )  $\nu_{\text{max}}$  3027 (broad), 2981, 2939, 1774, 1716, 1178, 1025  $\text{cm}^{-1}$ ;  $^1\text{H}$  NMR ( $\text{CDCl}_3$ )  $\delta$  4.50 (1H, t,  $J = 9.0$  Hz, H-5), 4.29 (1H, t,  $J = 9.0$  Hz, H-5), 3.12 (1H, q,  $J = 9.0$  Hz, H-3), 2.88 (1H, m, H-2), 1.37 (3H, d,  $J = 6.9$  Hz, H-6);  $^{13}\text{C}$  NMR ( $\text{CDCl}_3$ )  $\delta$  177.5 (C, C-1), 175.6 (C, C-4), 66.4 ( $\text{CH}_2$ , C-5), 47.7 (CH, C-3), 37.8 (CH, C-2), 14.6 ( $\text{CH}_3$ , C-6) ; EIMS  $m/z$  144  $[\text{M}]^+$ .

**Methylation of 11:** Compound 11, (2.0 mg) was dissolved in  $\text{Et}_2\text{O}$  (200  $\mu\text{L}$ ) and a solution of  $\text{CH}_2\text{N}_2$  in  $\text{Et}_2\text{O}$  was added drop wise until the yellow color persisted. The solution was stirred for 5 minutes and the solvent removed under a stream of  $\text{N}_2$  to yield the methyl ester **12** (2.0 mg).

**Compound 12:**  $^1\text{H}$  NMR ( $\text{CDCl}_3$ )  $\delta$  4.46 (1H, t,  $J = 9.2$  Hz, H-5), 4.24 (1H, t,  $J = 9.2$  Hz, H-5), 3.76 (3H, s,  $\text{OCH}_3$ ), 3.07 (1H, dt,  $J = 10.2, 9.2$  Hz, H-3), 2.85 (1H, dq,  $J = 10.2, 7.1$  Hz, H-2), 1.34 (3H, d,  $J = 7.1$  Hz, H-6) ; HREIMS  $m/z$  159.0657  $[\text{M}+\text{H}]^+$  (calcd for  $\text{C}_7\text{H}_{11}\text{O}_4$ , 159.0686).

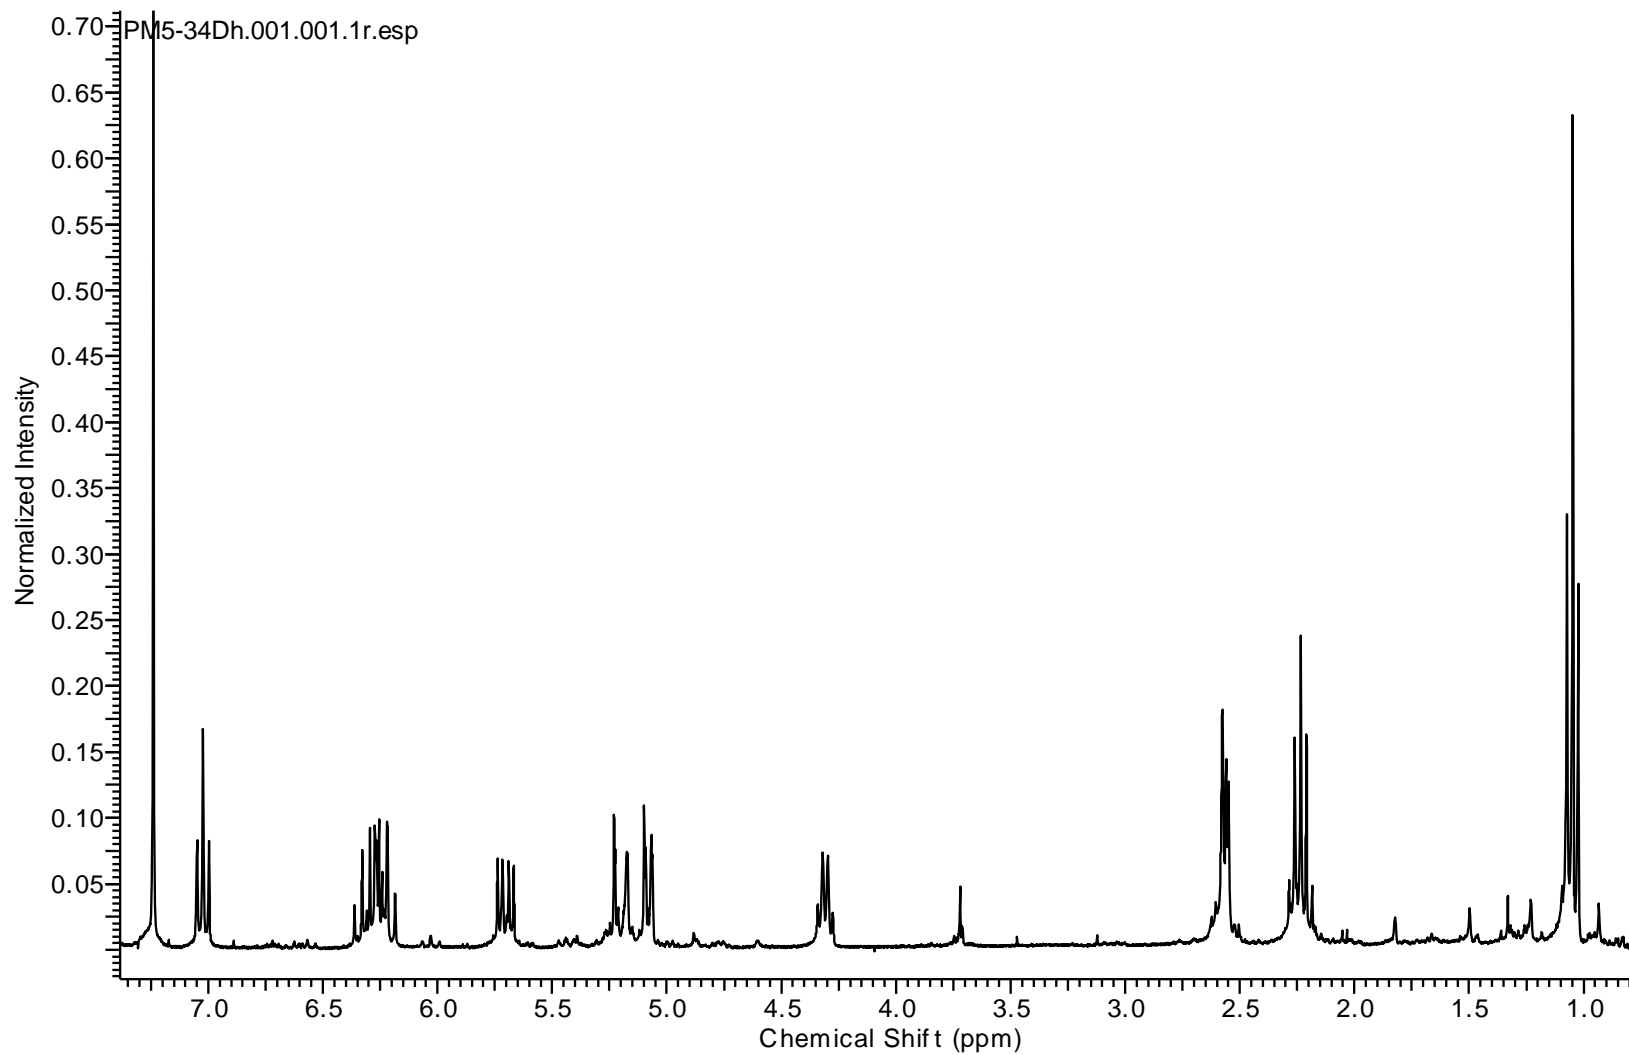

S16  $^1\text{H}$  NMR of Berkedienoic acid(**13**), 300 MHz,  $\text{CDCl}_3$



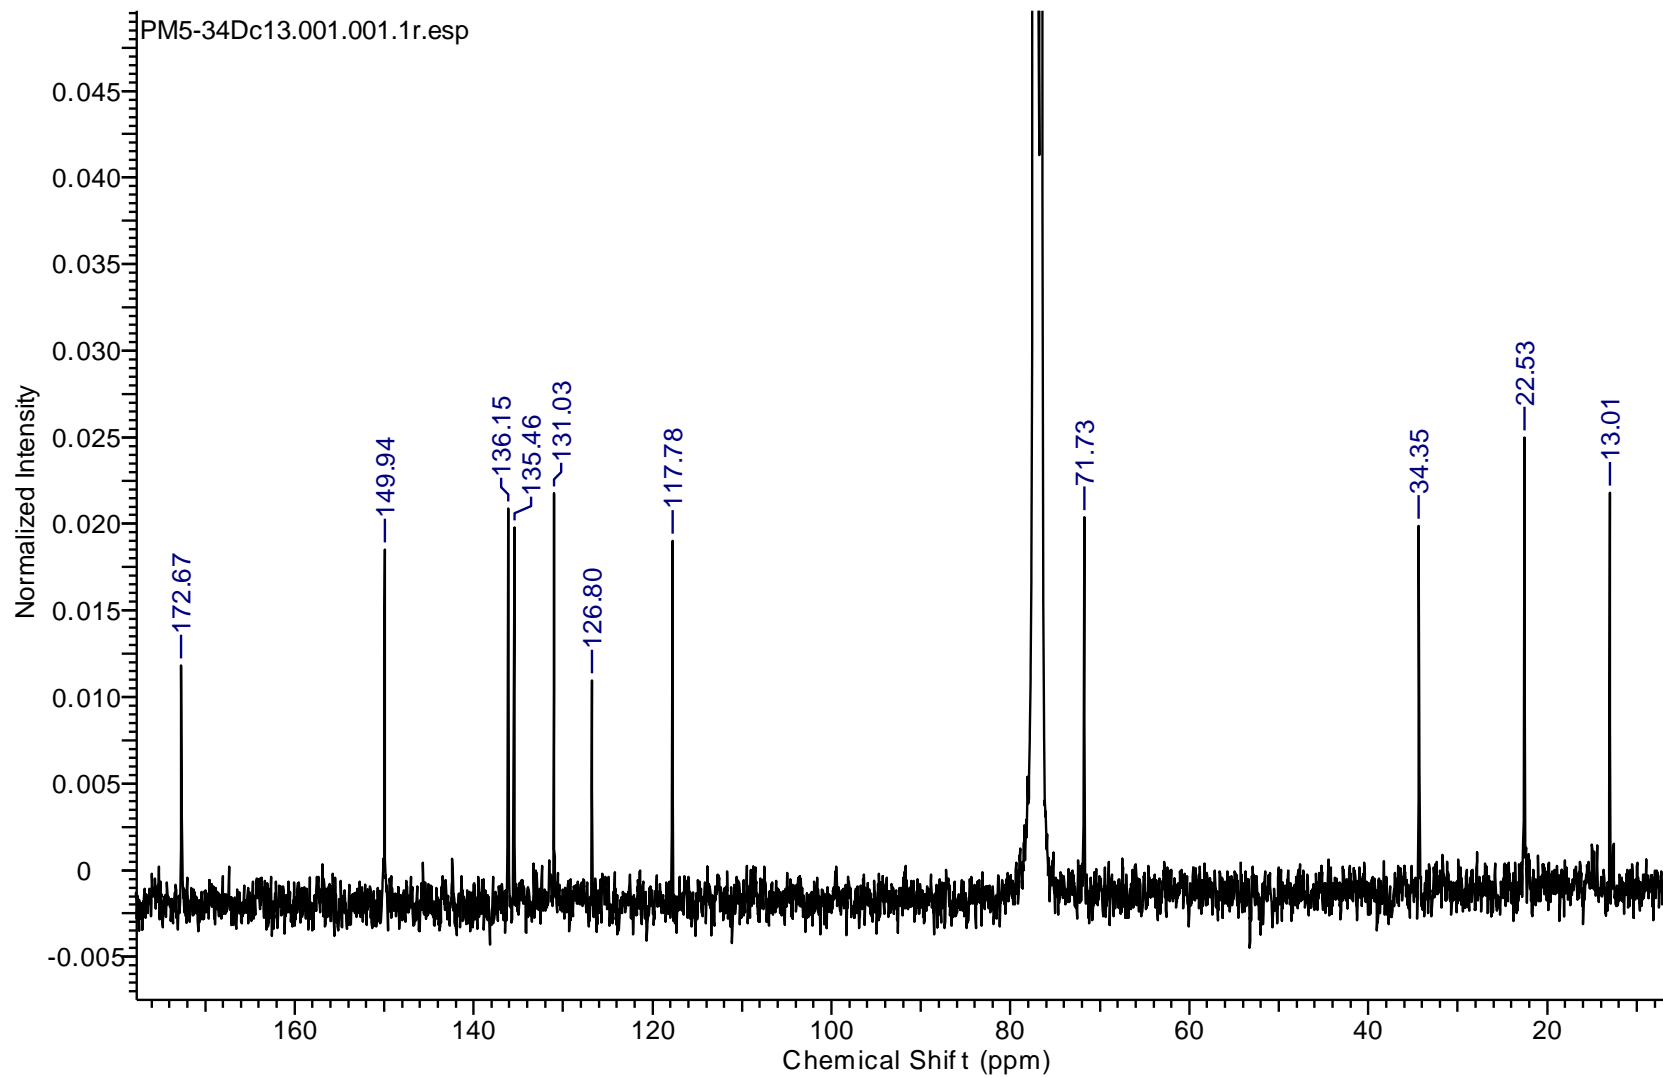

S17  $^{13}\text{C}$  NMR of Berkedienoic acid(**13**), 75 MHz,  $\text{CDCl}_3$

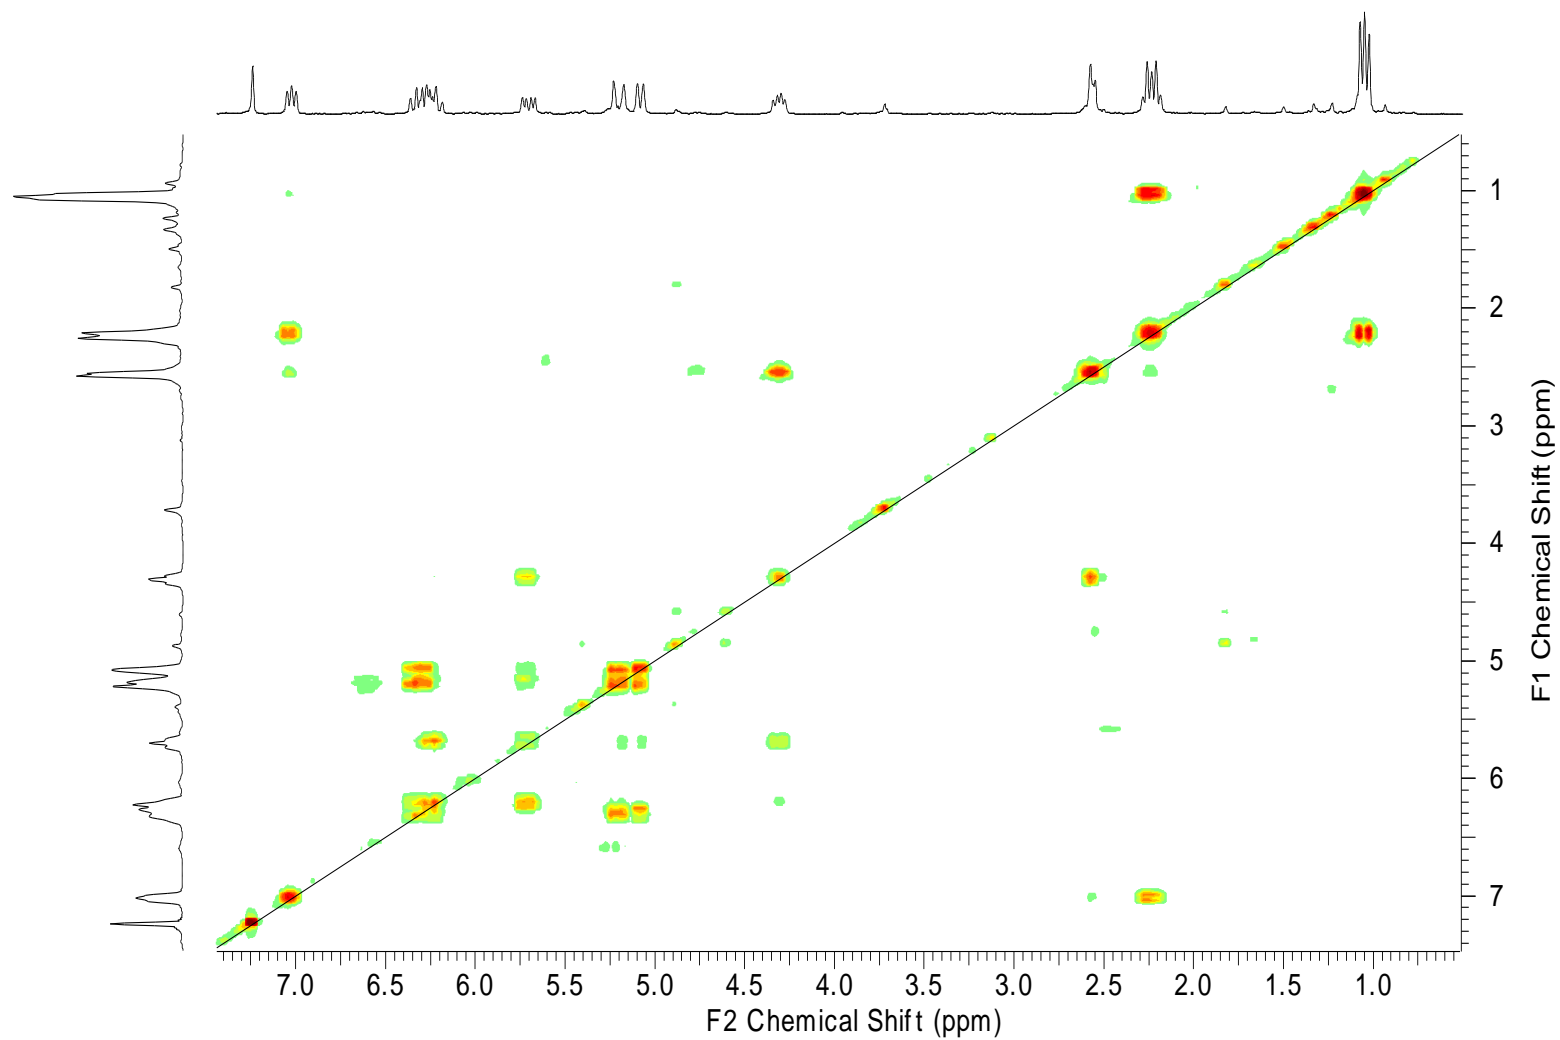

S18 COSY of Berkedienoic acid (**13**), 300 MHz, CDCl<sub>3</sub>

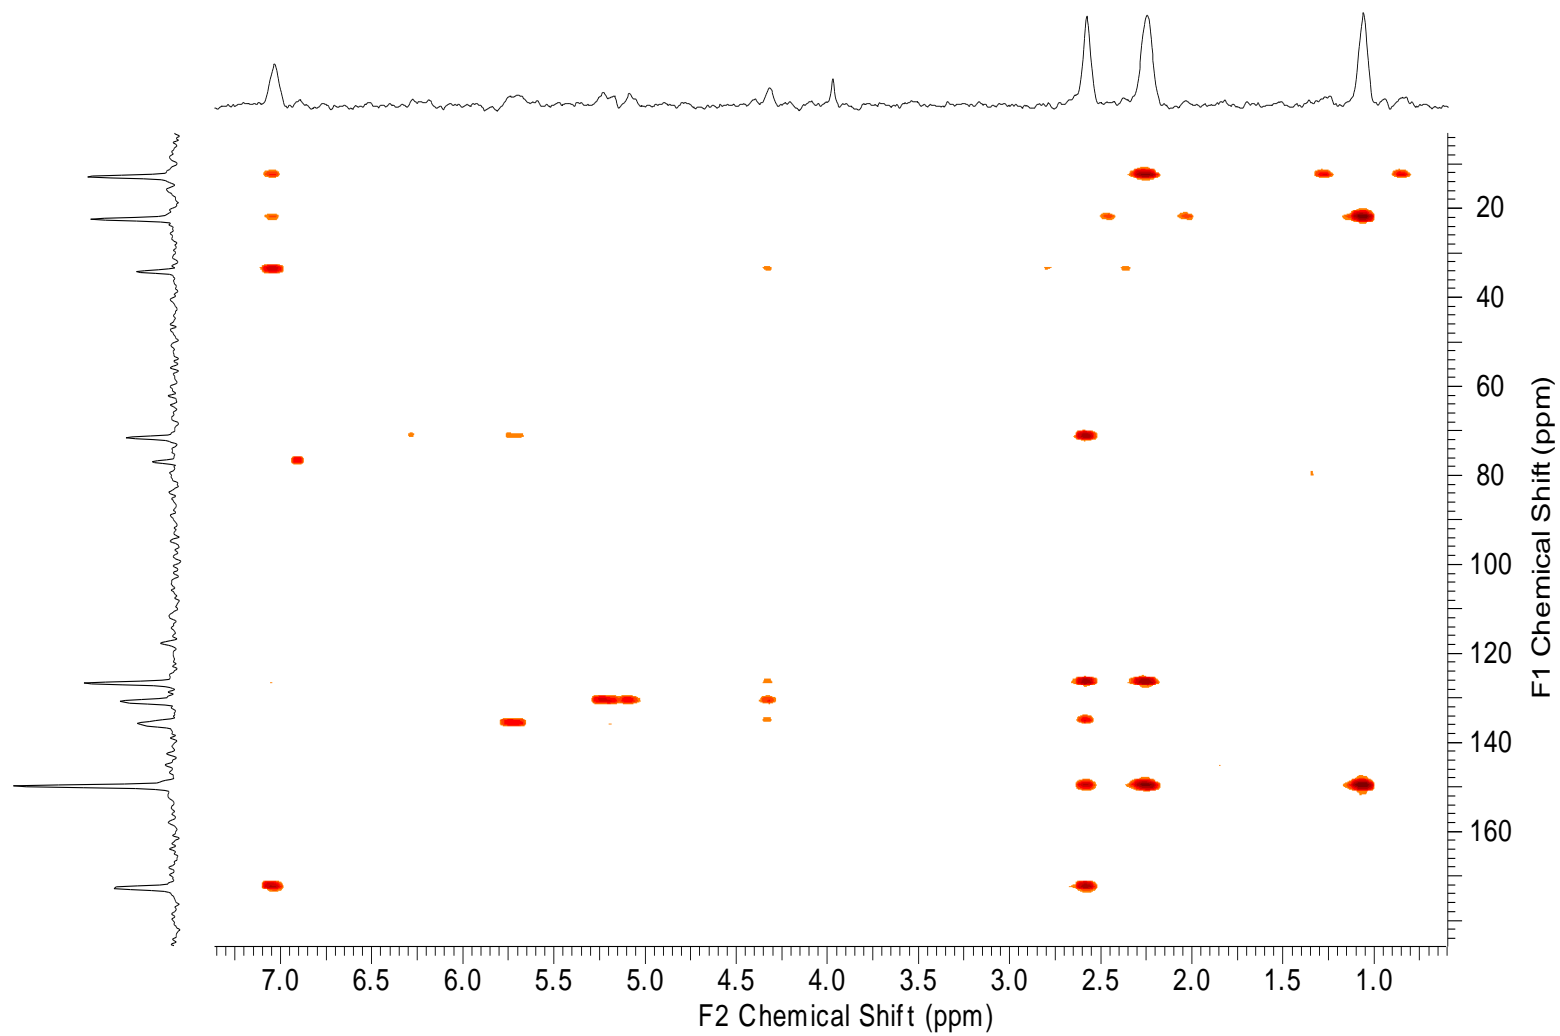

S19 HMBC of Berkedienoic acid (**13**), 300 MHz, CDCl<sub>3</sub>

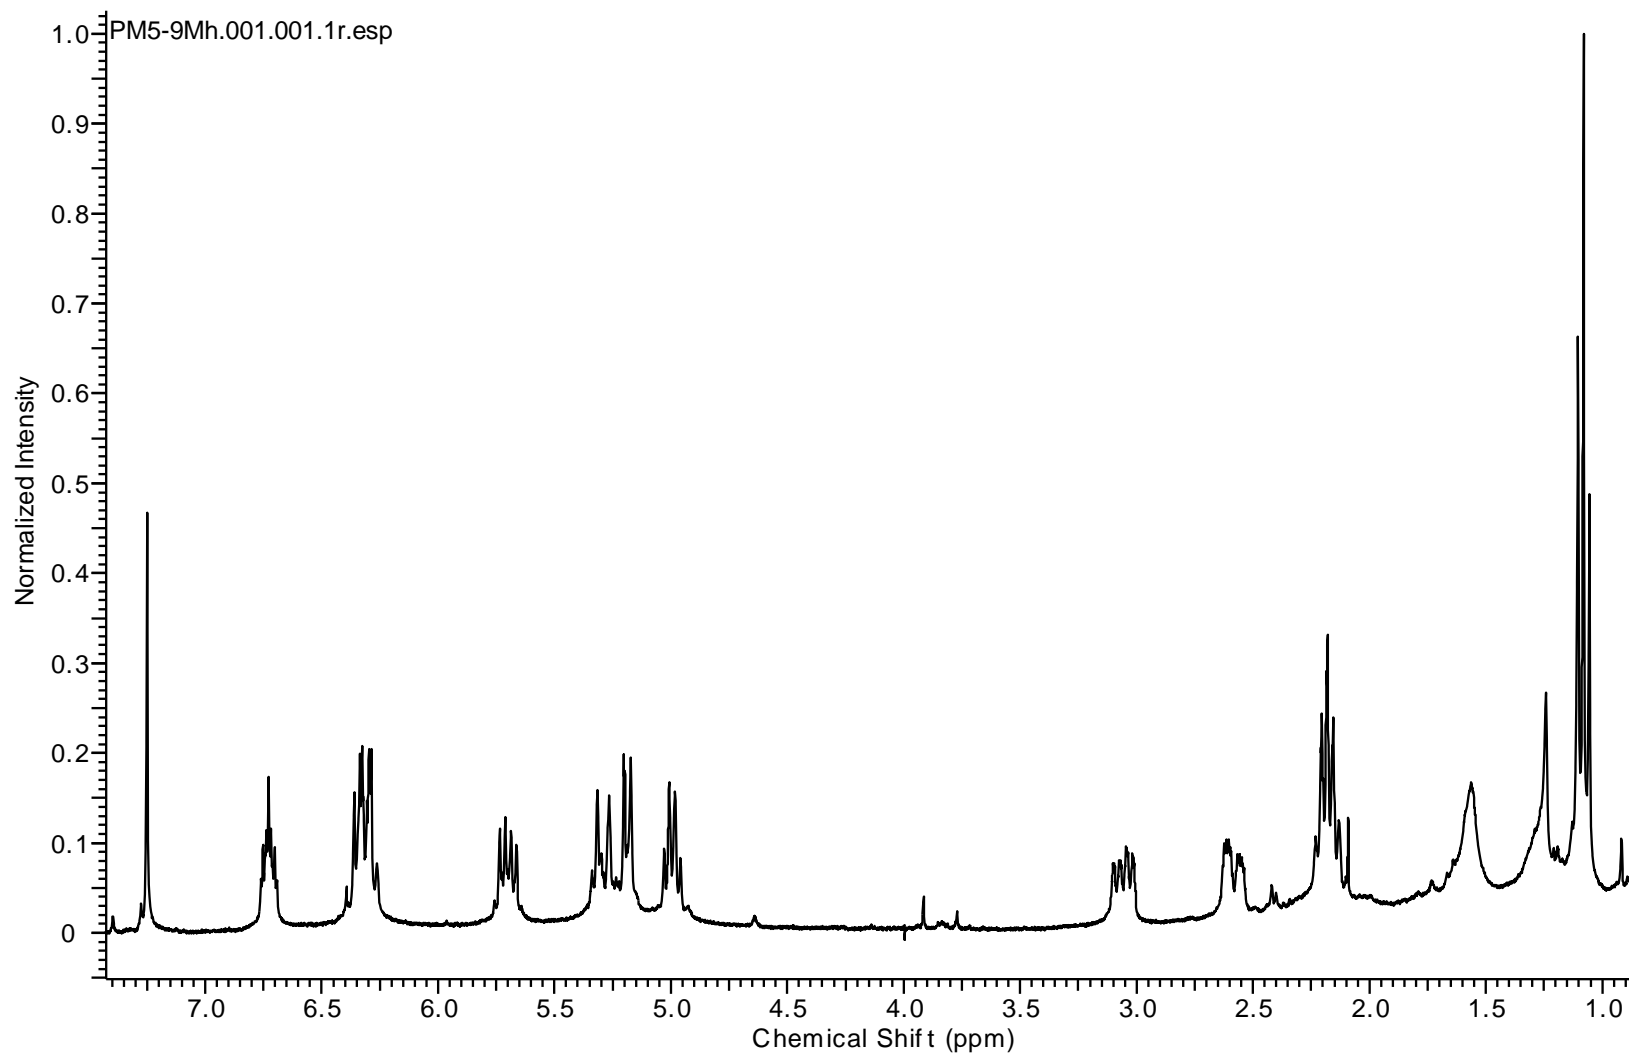

S20  $^1\text{H}$  NMR of Berkedienolactone (**15**), 300 MHz,  $\text{CDCl}_3$

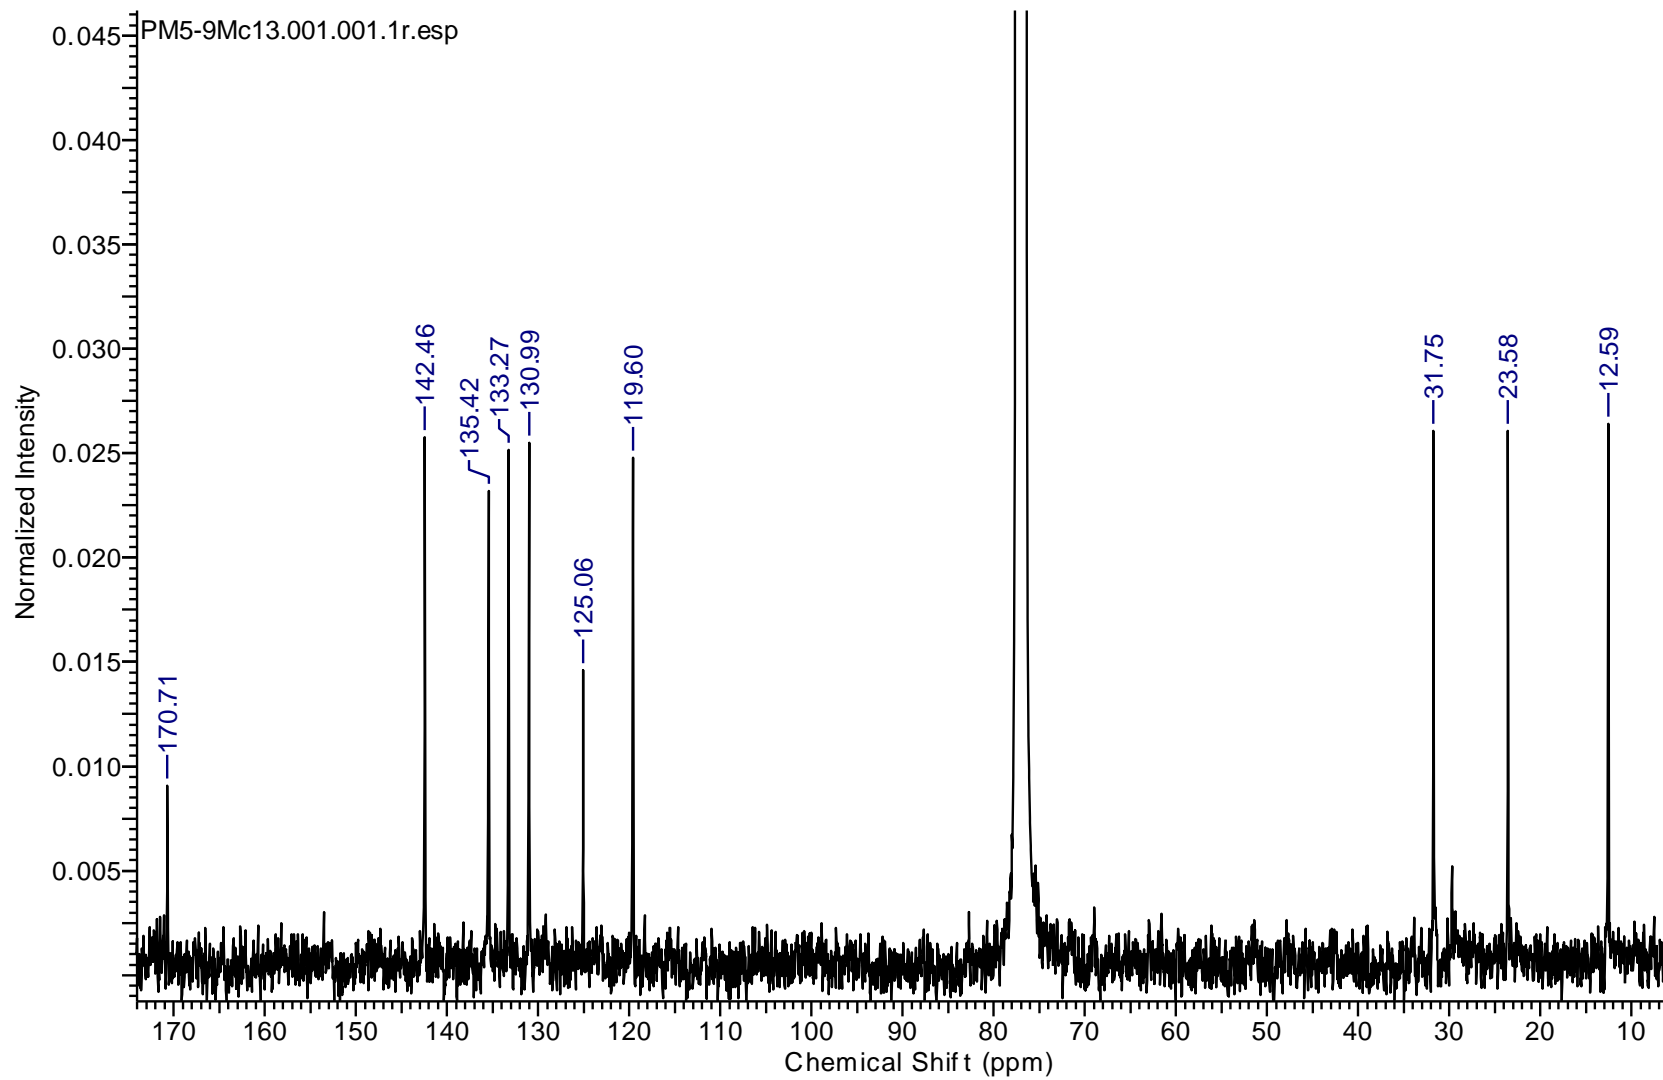

S21  $^{13}\text{C}$  NMR of Berkedienolactone (**15**), 75 MHz,  $\text{CDCl}_3$

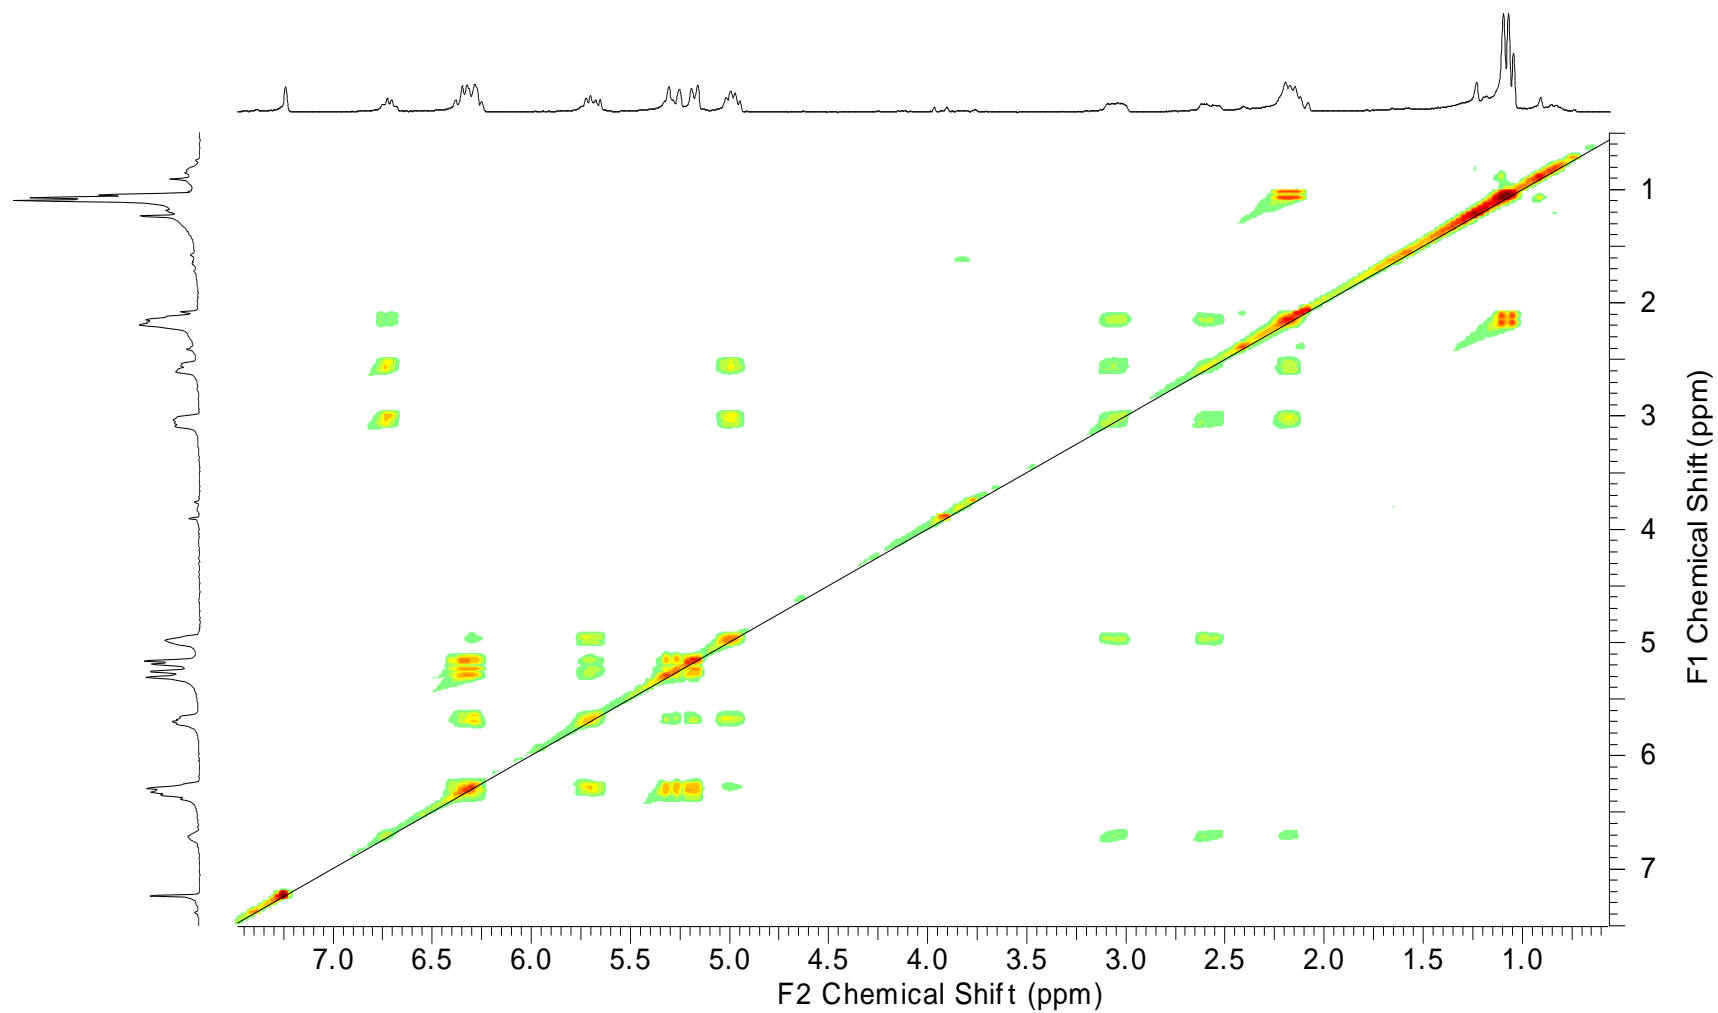

S22 COSY of Berkedienolactone (**15**), 300 MHz, CDCl<sub>3</sub>

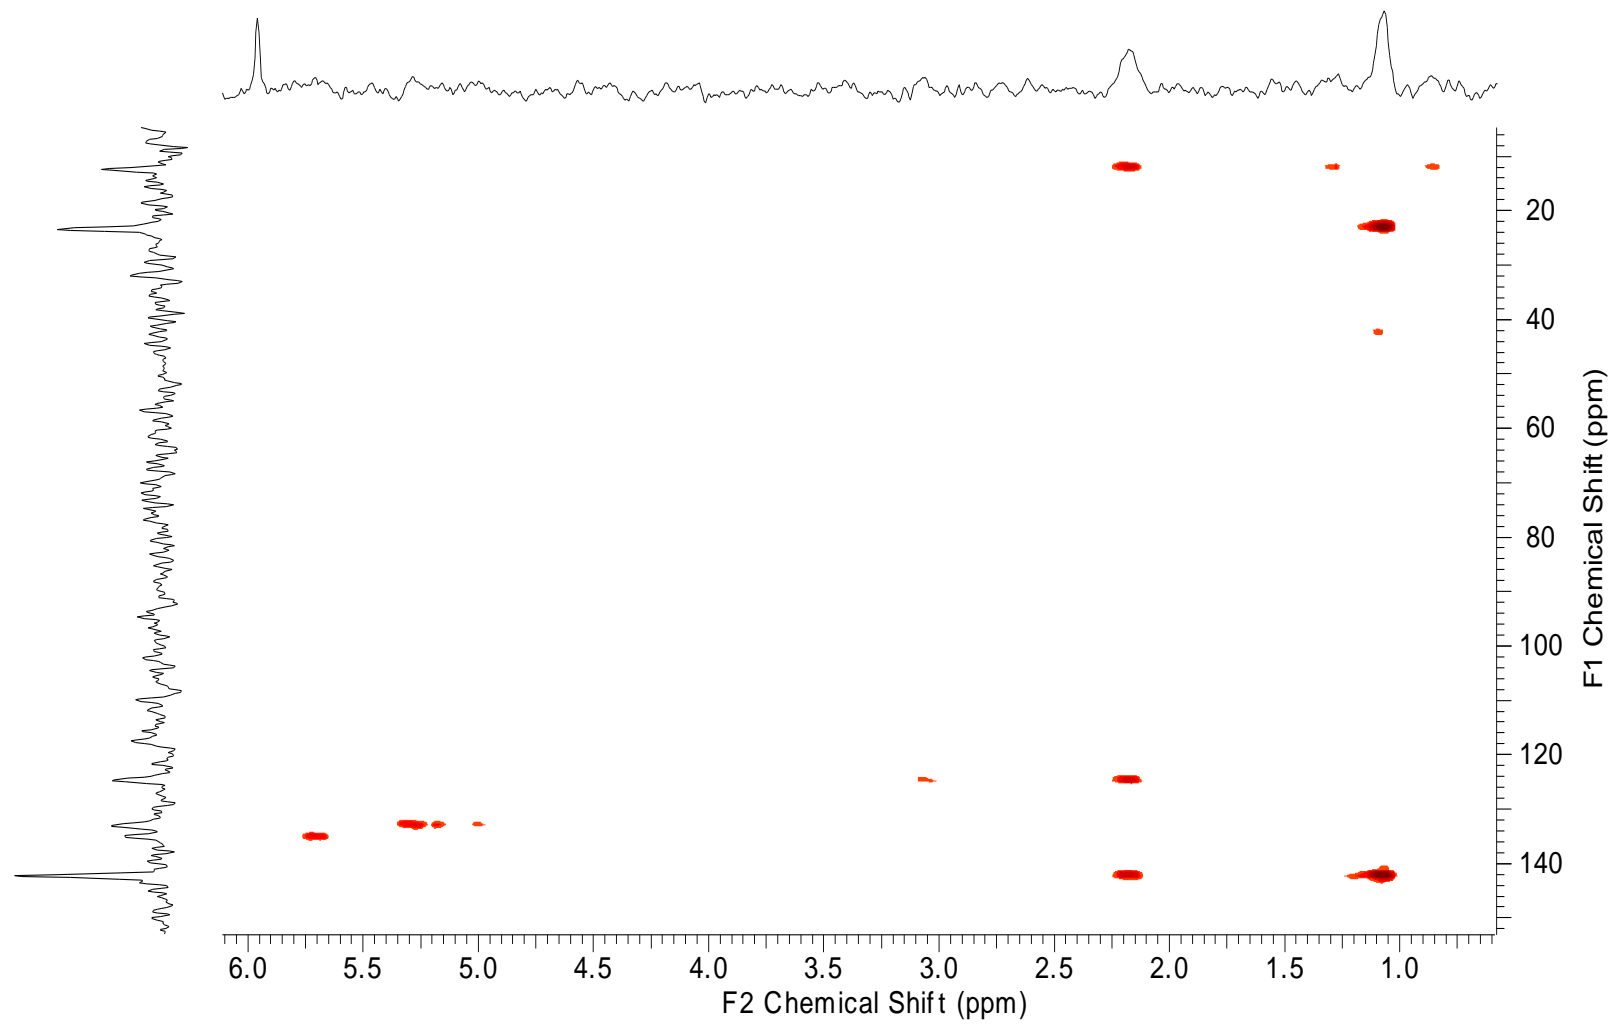

S23 HMBC of Berkedienolactone (**15**), 300 MHz, CDCl<sub>3</sub>

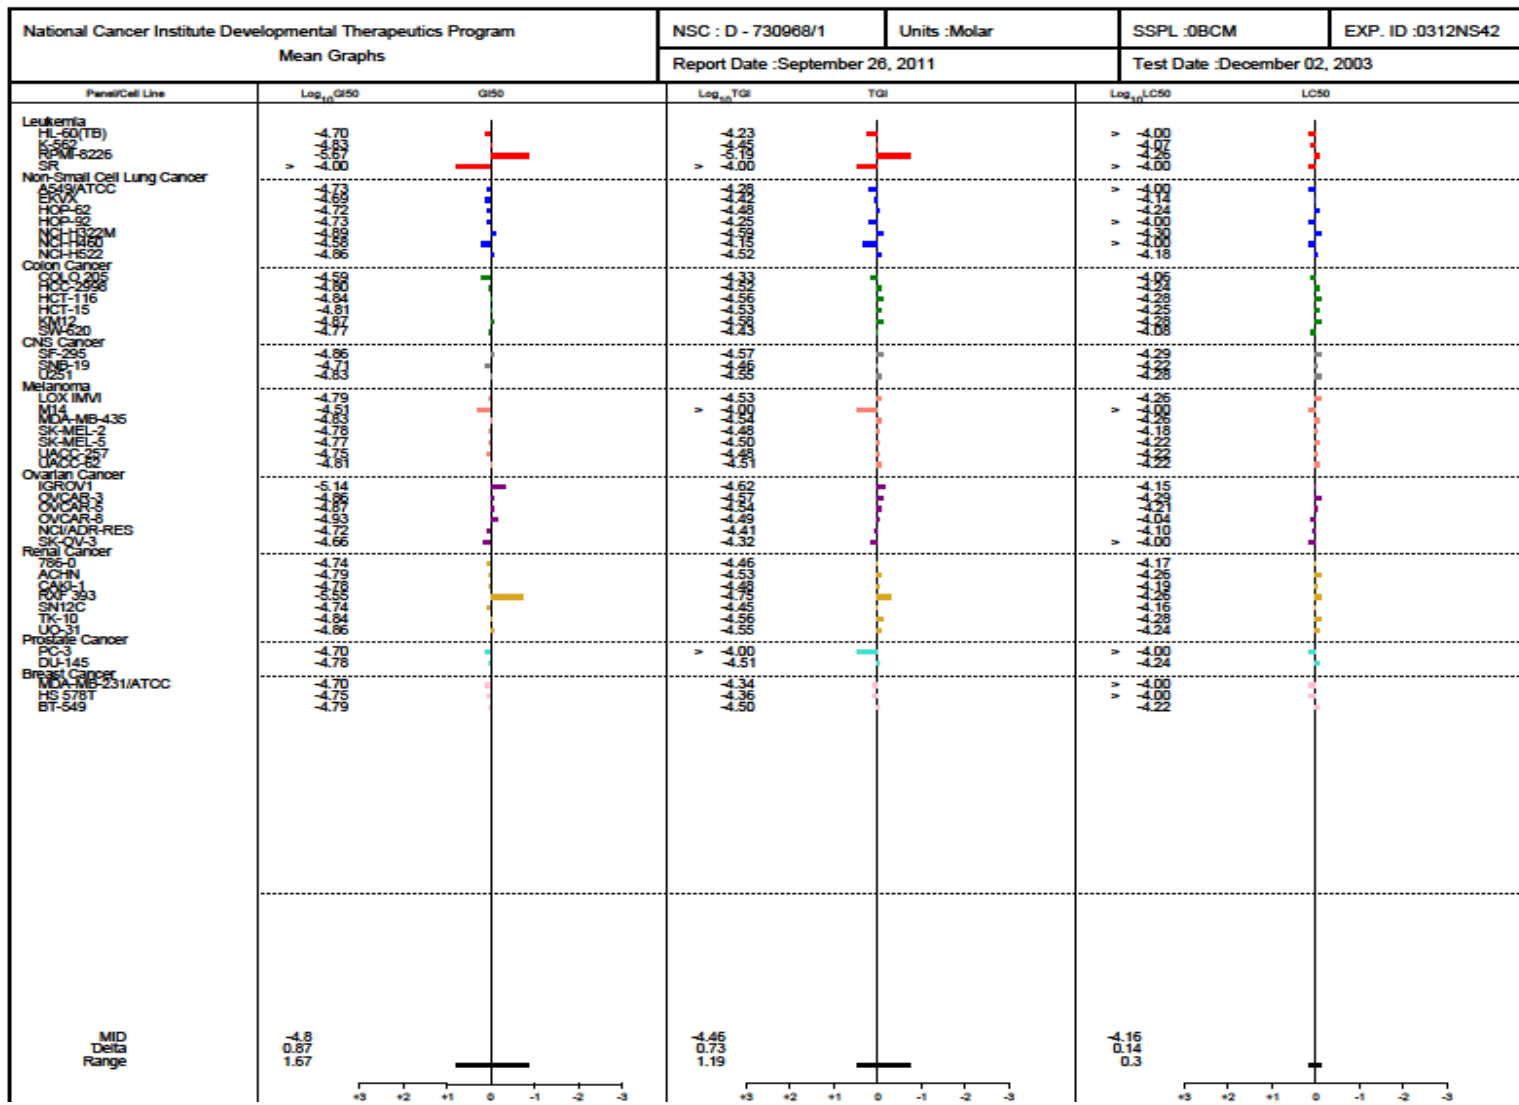

S 24 NCI cell line data for berkazaphilone B (2)



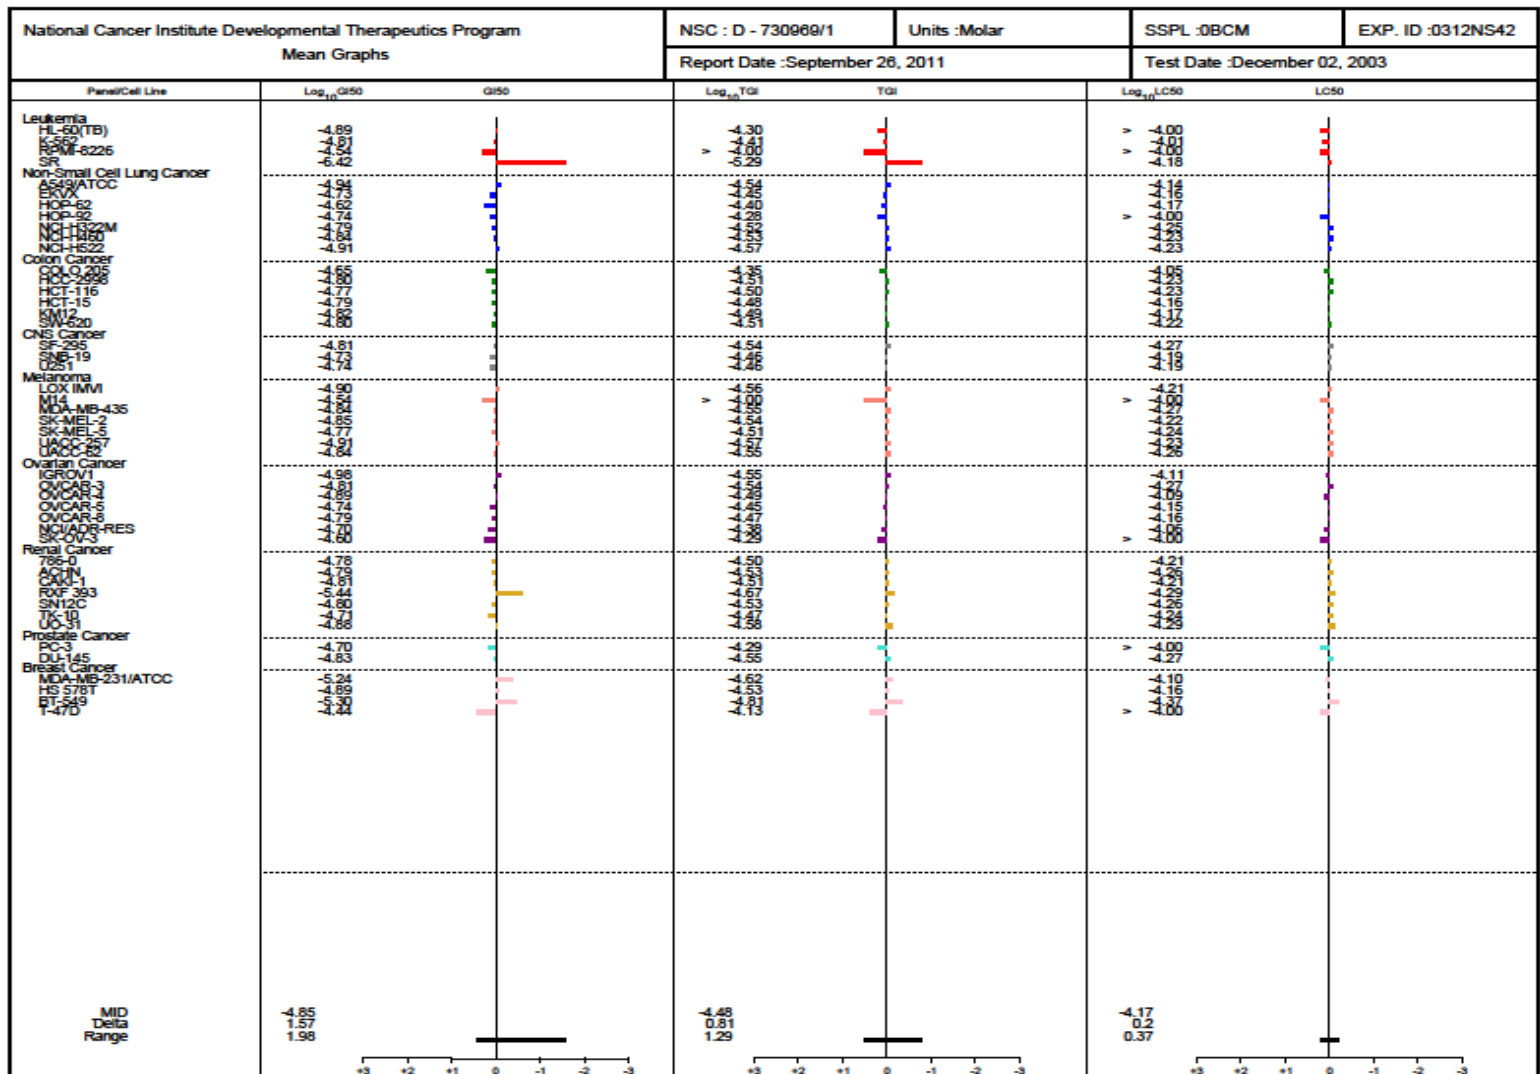

S 25 NCI cell line data for berkazaphilone C (4)
